# Supplementary material for: Transcriptomes of Saussurea (Asteraceae) Provide Insights into High-Altitude Adaptation
Source: MDPI journal article supplement (doi:10.3390/plants10081715), 2021-08-20
Supplement: s1 [file s1]

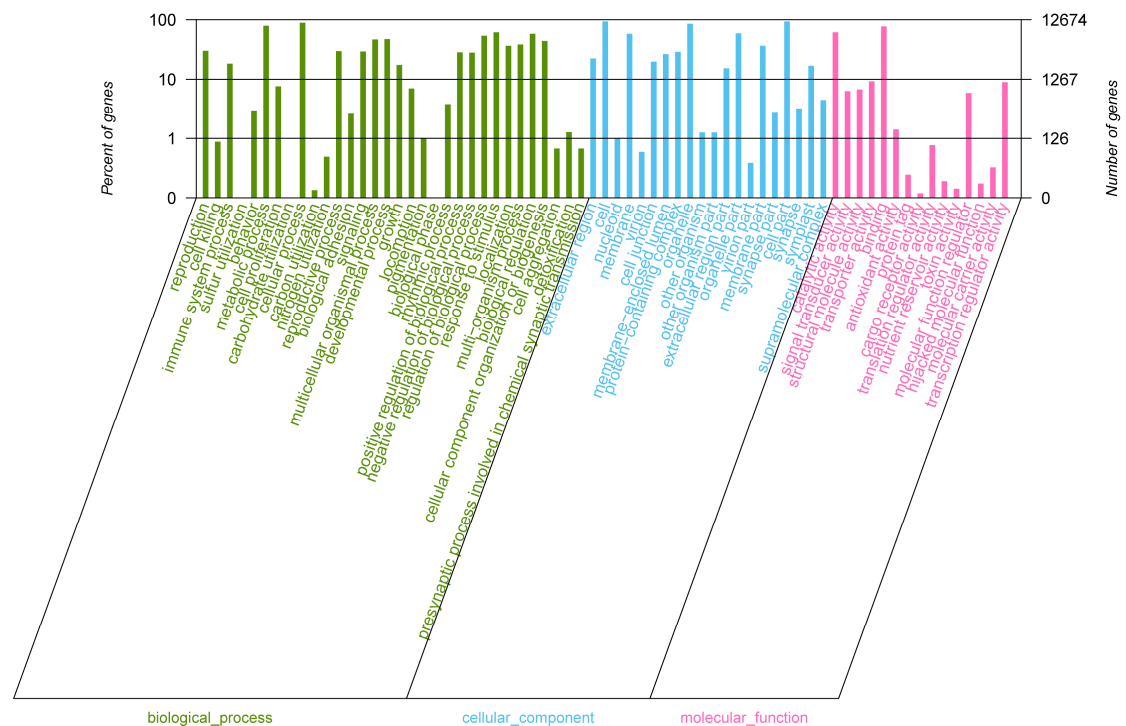

**Figure S3** GO terms of all unigenes of *Saussurea pachyneura*. Three functional categories: cellular component, molecular function and biological process are included.

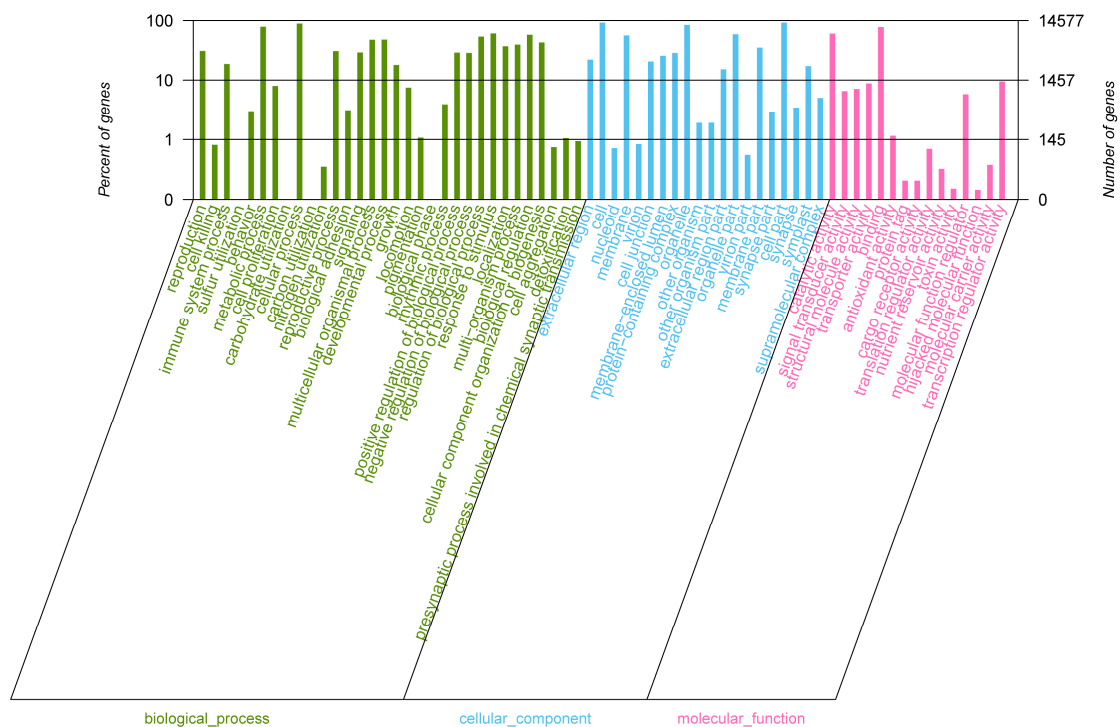

**Figure S4** GO terms of all unigenes of *Saussurea salwinensis*. Three functional categories: cellular component, molecular function and biological process are included.
