# Supplementary material for: Transcriptomes of Saussurea (Asteraceae) Provide Insights into High-Altitude Adaptation
Source: Plants (Basel). 2021 Aug 20;10(8):1715. doi: 10.3390/plants10081715 (PMC8402177; doi:10.3390/plants10081715)
Supplement: Supplementary file 1 [file plants-10-01715-s001.zip › Supplementary Tables S1-S4.xlsx]

## Sheet: Table_S1
Table S1 Sample information of five species of Saussurea.
Species	Collection locality	Collector/No.	Herbarium
S. amara	Changbai Mountain, Jilin Province, China	H.C.Z-18070502	HIB
S. amurensis	Changbai Mountain, Jilin Province, China	H.C.Z.-18070506	HIB
S. pachyneura	De Qin County, Yunnan Province, China	FSC-646	KUN
S. salwinensis	De Qin County, Yunnan Province, China	Zhangxu-79	KUN
S. veletina	De Qin County, Yunnan Province, China	Deng7057	KUN

## Sheet: Table_S2
Table S1 Summary of reads information of sequenced transcriptomes.
Species	Row reads						Clean reads
	Total reads	Total bases	Error%	Q20%	Q30%	GC%	Total reads	Total bases	Error%	Q20%	Q30%	GC%
S. pachyneura	90273538	13598104712	0.0293	96.25	90.44	46.18	90131338	13175359818	0.0285	96.68	91	45.8
S. amurensis	80031520	12055020256	0.0299	95.96	90.07	46.97	79753048	11655540315	0.0288	96.53	90.76	46.51
S. amara	89307476	13452410626	0.0296	96.17	90.21	44.63	89162976	13161419019	0.029	96.48	90.6	44.36
S. salwinensis	92114278	13875221590	0.0296	96.2	90.19	43.92	91985004	13637870172	0.0291	96.45	90.51	43.69
S. veletina	86678388	13056282870	0.0298	96.12	90.06	44.48	86567930	12796383602	0.0292	96.42	90.43	44.21

## Sheet: Table_S3
Table S2 Annotation information of positively selected genes to TAIR11 database.
Query ID	Subject ID	Gene ID	Type	Tax ID	Gene symbol	Description
TRINITY_DN11500_c0_g1	AT1G79400	844278	ensembl_gene_id	A. thaliana	CHX2	cation/H+ exchanger 2
TRINITY_DN11500_c0_g1	AT1G16380	838208	ensembl_gene_id	A. thaliana	ATCHX1	Cation/hydrogen exchanger family protein
TRINITY_DN11500_c0_g1	AT3G17630	821030	ensembl_gene_id	A. thaliana	CHX19	cation/H+ exchanger 19
TRINITY_DN11500_c0_g1	AT2G13620	815847	ensembl_gene_id	A. thaliana	CHX15	cation/hydrogen exchanger 15
TRINITY_DN15383_c0_g1	AT2G38570	818439	ensembl_gene_id	A. thaliana	AT2G38570	hypothetical protein
TRINITY_DN15383_c0_g1	AT5G23010	832365	ensembl_gene_id	A. thaliana	MAM1	methylthioalkylmalate synthase 1
TRINITY_DN16457_c0_g1	AT5G61510	836272	ensembl_gene_id	A. thaliana	AT5G61510	GroES-like zinc-binding alcohol dehydrogenase family protein
TRINITY_DN16457_c0_g1	AT4G21580	828243	ensembl_gene_id	A. thaliana	AT4G21580	oxidoreductase, zinc-binding dehydrogenase family protein
TRINITY_DN16719_c0_g1	AT3G19210	821455	ensembl_gene_id	A. thaliana	RAD54	DNA repair/recombination protein
TRINITY_DN16719_c0_g1	AT1G08600	837382	ensembl_gene_id	A. thaliana	ATRX	P-loop containing nucleoside triphosphate hydrolases superfamily protein
TRINITY_DN17681_c0_g1	AT5G05960	830481	ensembl_gene_id	A. thaliana	AT5G05960	Bifunctional inhibitor/lipid-transfer protein/seed storage 2S albumin superfamily protein
TRINITY_DN17681_c0_g1	AT3G53980	824565	ensembl_gene_id	A. thaliana	AT3G53980	Bifunctional inhibitor/lipid-transfer protein/seed storage 2S albumin superfamily protein
TRINITY_DN17681_c0_g1	AT2G37870	818363	ensembl_gene_id	A. thaliana	AT2G37870	Bifunctional inhibitor/lipid-transfer protein/seed storage 2S albumin superfamily protein
TRINITY_DN17681_c0_g1	AT5G48485	834904	ensembl_gene_id	A. thaliana	DIR1	Bifunctional inhibitor/lipid-transfer protein/seed storage 2S albumin superfamily protein
TRINITY_DN18169_c0_g1	AT1G70600	843397	ensembl_gene_id	A. thaliana	AT1G70600	Ribosomal protein L18e/L15 superfamily protein
TRINITY_DN18169_c0_g1	AT1G23290	838938	ensembl_gene_id	A. thaliana	RPL27AB	Ribosomal protein L18e/L15 superfamily protein
TRINITY_DN18169_c0_g1	AT1G12960	837854	ensembl_gene_id	A. thaliana	AT1G12960	Ribosomal protein L18e/L15 superfamily protein
TRINITY_DN18169_c0_g1	AT3G26115	822210	ensembl_gene_id	A. thaliana	AT3G26115	Pyridoxal-5'-phosphate-dependent enzyme family protein
TRINITY_DN18985_c1_g1	AT3G29750	822661	ensembl_gene_id	A. thaliana	AT3G29750	Eukaryotic aspartyl protease family protein
TRINITY_DN18985_c1_g1	AT3G42723	823303	ensembl_gene_id	A. thaliana	AT3G42723	ATP binding / aminoacyl-tRNA ligase/ nucleotide binding protein
TRINITY_DN18985_c1_g1	AT3G30770	822832	ensembl_gene_id	A. thaliana	AT3G30770	Eukaryotic aspartyl protease family protein
TRINITY_DN18985_c1_g1	AT5G27800	832842	ensembl_gene_id	A. thaliana	AT5G27800	Class II aminoacyl-tRNA and biotin synthetases superfamily protein
TRINITY_DN18985_c1_g1	AT4G16730	827376	ensembl_gene_id	A. thaliana	TPS02	terpene synthase 02
TRINITY_DN19113_c0_g1	AT5G13710	831216	ensembl_gene_id	A. thaliana	SMT1	sterol methyltransferase 1
TRINITY_DN19113_c0_g1	AT1G76090	843941	ensembl_gene_id	A. thaliana	SMT3	sterol methyltransferase 3
TRINITY_DN19113_c0_g1	AT1G20330	838621	ensembl_gene_id	A. thaliana	SMT2	sterol methyltransferase 2
TRINITY_DN19113_c0_g1	AT3G62180	825391	ensembl_gene_id	A. thaliana	AT3G62180	Plant invertase/pectin methylesterase inhibitor superfamily protein
TRINITY_DN19135_c0_g1	AT1G71950	843526	ensembl_gene_id	A. thaliana	AT1G71950	Proteinase inhibitor, propeptide
TRINITY_DN19135_c0_g1	AT1G66220	842937	ensembl_gene_id	A. thaliana	AT1G66220	Subtilase family protein
TRINITY_DN19135_c0_g1	AT4G21323	827881	ensembl_gene_id	A. thaliana	AT4G21323	Subtilase family protein
TRINITY_DN19135_c0_g1	AT4G10550	826647	ensembl_gene_id	A. thaliana	AT4G10550	Subtilase family protein
TRINITY_DN19135_c0_g1	AT1G32950	840189	ensembl_gene_id	A. thaliana	AT1G32950	Subtilase family protein
TRINITY_DN19254_c0_g1	AT3G17550	821021	ensembl_gene_id	A. thaliana	AT3G17550	Haloacid dehalogenase-like hydrolase (HAD) superfamily protein
TRINITY_DN19254_c0_g1	AT5G11860	831059	ensembl_gene_id	A. thaliana	SSP5	SCP1-like small phosphatase 5
TRINITY_DN19886_c0_g1	AT3G20050	821544	ensembl_gene_id	A. thaliana	TCP-1	T-complex protein 1 alpha subunit
TRINITY_DN19886_c0_g1	AT3G11830	820356	ensembl_gene_id	A. thaliana	AT3G11830	TCP-1/cpn60 chaperonin family protein
TRINITY_DN19886_c0_g1	AT3G18190	821346	ensembl_gene_id	A. thaliana	AT3G18190	TCP-1/cpn60 chaperonin family protein
TRINITY_DN19886_c0_g1	AT5G20890	832213	ensembl_gene_id	A. thaliana	AT5G20890	TCP-1/cpn60 chaperonin family protein
TRINITY_DN20217_c0_g1	AT1G72820	843613	ensembl_gene_id	A. thaliana	AT1G72820	Mitochondrial substrate carrier family protein
TRINITY_DN20217_c0_g1	AT5G26200	832689	ensembl_gene_id	A. thaliana	AT5G26200	Mitochondrial substrate carrier family protein
TRINITY_DN20217_c0_g1	AT5G15640	831418	ensembl_gene_id	A. thaliana	AT5G15640	Mitochondrial substrate carrier family protein
TRINITY_DN20235_c0_g1	AT4G05630	825935	ensembl_gene_id	A. thaliana	AT4G05630	B3 domain protein
TRINITY_DN20257_c1_g1	AT2G35470	818112	ensembl_gene_id	A. thaliana	AT2G35470	ribosome maturation factor
TRINITY_DN20257_c1_g1	AT2G35658	6240444	ensembl_gene_id	A. thaliana	AT2G35658	transmembrane protein
TRINITY_DN20257_c1_g1	AT1G07860	837301	ensembl_gene_id	A. thaliana	AT1G07860	Serine/Threonine-kinase RLCKVII protein
TRINITY_DN20295_c0_g4	AT1G67020	843020	ensembl_gene_id	A. thaliana	AT1G67020	transmembrane protein
TRINITY_DN20295_c0_g4	AT2G15180	816006	ensembl_gene_id	A. thaliana	AT2G15180	Zinc knuckle (CCHC-type) family protein
TRINITY_DN20342_c0_g1	AT5G55980	835696	ensembl_gene_id	A. thaliana	AT5G55980	serine-rich protein-like protein
TRINITY_DN20342_c0_g1	AT3G13227	820516	ensembl_gene_id	A. thaliana	AT3G13227	serine-rich protein-like protein
TRINITY_DN20342_c0_g1	AT1G24577	5007720	ensembl_gene_id	A. thaliana	AT1G24577	hypothetical protein
TRINITY_DN20342_c0_g1	AT1G67910	843119	ensembl_gene_id	A. thaliana	AT1G67910	hypothetical protein
TRINITY_DN20360_c0_g1	AT2G15680	816061	ensembl_gene_id	A. thaliana	CML30	Calcium-binding EF-hand family protein
TRINITY_DN20360_c0_g1	AT1G24620	839076	ensembl_gene_id	A. thaliana	AT1G24620	EF hand calcium-binding protein family
TRINITY_DN20360_c0_g1	AT1G18210	838401	ensembl_gene_id	A. thaliana	AT1G18210	Calcium-binding EF-hand family protein
TRINITY_DN20360_c0_g1	AT1G66400	842958	ensembl_gene_id	A. thaliana	CML23	calmodulin like 23
TRINITY_DN20380_c0_g1	AT1G11125	10723097	ensembl_gene_id	A. thaliana	AT1G11125	hypothetical protein
TRINITY_DN20380_c0_g1	AT5G46620	834705	ensembl_gene_id	A. thaliana	AT5G46620	hypothetical protein
TRINITY_DN20380_c0_g1	AT5G40450	834043	ensembl_gene_id	A. thaliana	AT5G40450	A-kinase anchor-like protein
TRINITY_DN20476_c0_g1	AT5G64240	836545	ensembl_gene_id	A. thaliana	MC3	metacaspase 3
TRINITY_DN20476_c0_g1	AT1G02170	839561	ensembl_gene_id	A. thaliana	MC1	metacaspase 1
TRINITY_DN20476_c0_g1	AT4G25110	828614	ensembl_gene_id	A. thaliana	MC2	metacaspase 2
TRINITY_DN20661_c0_g1	AT5G23730	832438	ensembl_gene_id	A. thaliana	RUP2	Transducin/WD40 repeat-like superfamily protein
TRINITY_DN20661_c0_g1	AT5G52250	835301	ensembl_gene_id	A. thaliana	RUP1	Transducin/WD40 repeat-like superfamily protein
TRINITY_DN20661_c0_g1	AT2G32950	817857	ensembl_gene_id	A. thaliana	COP1	Transducin/WD40 repeat-like superfamily protein
TRINITY_DN20661_c0_g1	AT3G15354	820767	ensembl_gene_id	A. thaliana	SPA3	SPA1-related 3
TRINITY_DN20664_c0_g1	AT5G44310	834454	ensembl_gene_id	A. thaliana	AT5G44310	Late embryogenesis abundant protein (LEA) family protein
TRINITY_DN20664_c0_g1	AT2G36640	818236	ensembl_gene_id	A. thaliana	ECP63	embryonic cell protein 63
TRINITY_DN20664_c0_g1	AT3G53040	824470	ensembl_gene_id	A. thaliana	AT3G53040	late embryogenesis abundant protein, putative / LEA protein
TRINITY_DN21094_c1_g1	AT2G17980	816310	ensembl_gene_id	A. thaliana	ATSLY1	Sec1/munc18-like (SM) proteins superfamily
TRINITY_DN21094_c1_g1	AT4G31740	829302	ensembl_gene_id	A. thaliana	AT4G31740	Sec1/munc18-like (SM) proteins superfamily
TRINITY_DN21094_c1_g1	AT4G36100	829766	ensembl_gene_id	A. thaliana	AT4G36100	Sec1/munc18-like (SM) proteins superfamily
TRINITY_DN21094_c1_g1	AT4G12120	826820	ensembl_gene_id	A. thaliana	SEC1B	Sec1/munc18-like (SM) proteins superfamily
TRINITY_DN21094_c1_g1	AT1G12360	837791	ensembl_gene_id	A. thaliana	KEU	Sec1/munc18-like (SM) proteins superfamily
TRINITY_DN21141_c0_g1	AT1G68910	843224	ensembl_gene_id	A. thaliana	WIT2	WPP domain-interacting protein 2
TRINITY_DN21141_c0_g1	AT5G11390	831010	ensembl_gene_id	A. thaliana	WIT1	WPP domain-interacting protein 1
TRINITY_DN21141_c0_g1	AT2G32240	817784	ensembl_gene_id	A. thaliana	AT2G32240	early endosome antigen
TRINITY_DN21193_c0_g2	AT2G22570	816789	ensembl_gene_id	A. thaliana	NIC1	nicotinamidase 1
TRINITY_DN21193_c0_g2	AT5G46180	834660	ensembl_gene_id	A. thaliana	DELTA-OAT	ornithine-delta-aminotransferase
TRINITY_DN21193_c0_g2	AT1G08590	837381	ensembl_gene_id	A. thaliana	AT1G08590	Leucine-rich receptor-like protein kinase family protein
TRINITY_DN21193_c0_g2	AT1G26190	839160	ensembl_gene_id	A. thaliana	AT1G26190	Phosphoribulokinase / Uridine kinase family
TRINITY_DN21511_c0_g1	AT1G14040	837965	ensembl_gene_id	A. thaliana	AT1G14040	EXS (ERD1/XPR1/SYG1) family protein
TRINITY_DN21511_c0_g1	AT3G29060	822550	ensembl_gene_id	A. thaliana	AT3G29060	EXS (ERD1/XPR1/SYG1) family protein
TRINITY_DN21511_c0_g1	AT2G03240	814853	ensembl_gene_id	A. thaliana	AT2G03240	EXS (ERD1/XPR1/SYG1) family protein
TRINITY_DN21511_c0_g1	AT1G35350	840424	ensembl_gene_id	A. thaliana	AT1G35350	EXS (ERD1/XPR1/SYG1) family protein
TRINITY_DN21511_c0_g1	AT1G26730	839214	ensembl_gene_id	A. thaliana	AT1G26730	EXS (ERD1/XPR1/SYG1) family protein
TRINITY_DN21522_c1_g1	AT4G00755	828014	ensembl_gene_id	A. thaliana	AT4G00755	F-box family protein
TRINITY_DN21522_c1_g1	AT5G43950	834418	ensembl_gene_id	A. thaliana	AT5G43950	vacuolar protein sorting-associated protein (DUF946)
TRINITY_DN21552_c0_g4	AT4G23160	828415	ensembl_gene_id	A. thaliana	CRK8	cysteine-rich RECEPTOR-like kinase
TRINITY_DN21552_c0_g4	AT2G39940	818581	ensembl_gene_id	A. thaliana	COI1	RNI-like superfamily protein
TRINITY_DN21552_c0_g4	AT3G13030	820489	ensembl_gene_id	A. thaliana	AT3G13030	hAT transposon superfamily protein
TRINITY_DN21672_c3_g1	AT2G20180	816538	ensembl_gene_id	A. thaliana	PIL5	phytochrome interacting factor 3-like 5
TRINITY_DN21713_c3_g1	AT5G48150	834867	ensembl_gene_id	A. thaliana	PAT1	GRAS family transcription factor
TRINITY_DN21713_c3_g1	AT1G50600	841482	ensembl_gene_id	A. thaliana	SCL5	scarecrow-like 5
TRINITY_DN21775_c2_g1	AT5G35735	833550	ensembl_gene_id	A. thaliana	AT5G35735	Auxin-responsive family protein
TRINITY_DN21775_c2_g1	AT3G59070	825076	ensembl_gene_id	A. thaliana	AT3G59070	Cytochrome b561/ferric reductase transmembrane with DOMON related domain-containing protein
TRINITY_DN21775_c2_g1	AT5G47530	834803	ensembl_gene_id	A. thaliana	AT5G47530	Auxin-responsive family protein
TRINITY_DN21775_c2_g1	AT5G48750	834933	ensembl_gene_id	A. thaliana	AT5G48750	Cytochrome b561/ferric reductase transmembrane with DOMON related domain-containing protein
TRINITY_DN21775_c2_g1	AT3G07390	819927	ensembl_gene_id	A. thaliana	AIR12	auxin-induced in root cultures-like protein
TRINITY_DN21810_c0_g1	AT2G31170	817673	ensembl_gene_id	A. thaliana	SYCO ARATH	Cysteinyl-tRNA synthetase, class Ia family protein
TRINITY_DN21810_c0_g1	AT5G38830	833874	ensembl_gene_id	A. thaliana	AT5G38830	Cysteinyl-tRNA synthetase, class Ia family protein
TRINITY_DN21810_c0_g1	AT3G56300	824797	ensembl_gene_id	A. thaliana	AT3G56300	Cysteinyl-tRNA synthetase, class Ia family protein
TRINITY_DN22030_c1_g5	AT2G15080	815997	ensembl_gene_id	A. thaliana	RLP19	receptor like protein 19
TRINITY_DN22030_c1_g5	AT5G44700	834499	ensembl_gene_id	A. thaliana	GSO2	Leucine-rich repeat transmembrane protein kinase
TRINITY_DN22030_c1_g5	AT3G05660	819733	ensembl_gene_id	A. thaliana	RLP33	receptor like protein 33
TRINITY_DN22030_c1_g5	AT2G34930	818058	ensembl_gene_id	A. thaliana	AT2G34930	disease resistance family protein / LRR family protein
TRINITY_DN22030_c1_g6	AT2G25470	817085	ensembl_gene_id	A. thaliana	RLP21	receptor like protein 21
TRINITY_DN22030_c1_g6	AT2G33060	817868	ensembl_gene_id	A. thaliana	RLP27	receptor like protein 27
TRINITY_DN22030_c1_g6	AT5G40170	834015	ensembl_gene_id	A. thaliana	RLP54	receptor like protein 54
TRINITY_DN22038_c3_g2	AT4G11970	826804	ensembl_gene_id	A. thaliana	AT4G11970	YTH family protein
TRINITY_DN22072_c0_g1	AT3G02300	821167	ensembl_gene_id	A. thaliana	AT3G02300	Regulator of chromosome condensation (RCC1) family protein
TRINITY_DN22072_c0_g1	AT5G63860	836506	ensembl_gene_id	A. thaliana	UVR8	Regulator of chromosome condensation (RCC1) family protein
TRINITY_DN22072_c0_g1	AT3G55580	824723	ensembl_gene_id	A. thaliana	AT3G55580	Regulator of chromosome condensation (RCC1) family protein
TRINITY_DN22072_c0_g1	AT4G14368	7922506	ensembl_gene_id	A. thaliana	AT4G14368	Regulator of chromosome condensation (RCC1) family protein
TRINITY_DN22188_c0_g2	AT2G35965	28718331	ensembl_gene_id	A. thaliana	AT2G35965	hypothetical protein
TRINITY_DN22196_c3_g2	AT5G25220	832593	ensembl_gene_id	A. thaliana	KNAT3	homeobox protein knotted-1-like 3
TRINITY_DN22196_c3_g2	AT5G11060	830973	ensembl_gene_id	A. thaliana	KNAT4	homeobox protein knotted-1-like 4
TRINITY_DN22196_c3_g2	AT4G32040	829335	ensembl_gene_id	A. thaliana	KNAT5	homeobox protein knotted-1-like 5
TRINITY_DN22206_c2_g3	AT1G16480	838218	ensembl_gene_id	A. thaliana	AT1G16480	Tetratricopeptide repeat (TPR)-like superfamily protein
TRINITY_DN22206_c2_g3	AT4G13650	826999	ensembl_gene_id	A. thaliana	AT4G13650	Pentatricopeptide repeat (PPR) superfamily protein
TRINITY_DN22206_c2_g3	AT4G33170	829454	ensembl_gene_id	A. thaliana	AT4G33170	Tetratricopeptide repeat (TPR)-like superfamily protein
TRINITY_DN22206_c2_g3	AT5G09950	830856	ensembl_gene_id	A. thaliana	MEF7	Tetratricopeptide repeat (TPR)-like superfamily protein
TRINITY_DN22259_c0_g1	AT5G24810	832550	ensembl_gene_id	A. thaliana	AT5G24810	ABC1 family protein
TRINITY_DN22309_c4_g4	AT3G44400	823565	ensembl_gene_id	A. thaliana	AT3G44400	Disease resistance protein (TIR-NBS-LRR class) family
TRINITY_DN22318_c2_g1	AT5G56760	835778	ensembl_gene_id	A. thaliana	SERAT1;1	serine acetyltransferase 1;1
TRINITY_DN22318_c2_g1	AT3G13110	820499	ensembl_gene_id	A. thaliana	SERAT2;2	serine acetyltransferase 2;2
TRINITY_DN22318_c2_g1	AT1G55920	842043	ensembl_gene_id	A. thaliana	SERAT2;1	serine acetyltransferase 2;1
TRINITY_DN22318_c2_g1	AT4G35640	829716	ensembl_gene_id	A. thaliana	SERAT3;2	serine acetyltransferase 3;2
TRINITY_DN22318_c2_g1	AT2G17640	816271	ensembl_gene_id	A. thaliana	ATSERAT3;1	Trimeric LpxA-like enzymes superfamily protein
TRINITY_DN22367_c12_g1	AT5G15730	831429	ensembl_gene_id	A. thaliana	CRLK2	Protein kinase superfamily protein
TRINITY_DN22367_c12_g1	AT5G54590	835548	ensembl_gene_id	A. thaliana	CRLK1	Protein kinase superfamily protein
TRINITY_DN22398_c0_g1	AT2G41640	818762	ensembl_gene_id	A. thaliana	AT2G41640	Glycosyltransferase family 61 protein
TRINITY_DN22398_c0_g1	AT3G10320	820194	ensembl_gene_id	A. thaliana	AT3G10320	Glycosyltransferase family 61 protein
TRINITY_DN22398_c0_g1	AT3G57380	824905	ensembl_gene_id	A. thaliana	AT3G57380	Glycosyltransferase family 61 protein
TRINITY_DN22447_c2_g10	AT2G07180	815287	ensembl_gene_id	A. thaliana	AT2G07180	Protein kinase superfamily protein
TRINITY_DN22447_c2_g10	AT5G01020	831918	ensembl_gene_id	A. thaliana	AT5G01020	Protein kinase superfamily protein
TRINITY_DN22447_c2_g10	AT2G05940	815147	ensembl_gene_id	A. thaliana	RIPK	Protein kinase superfamily protein
TRINITY_DN22447_c2_g10	AT5G56460	835747	ensembl_gene_id	A. thaliana	AT5G56460	Protein kinase superfamily protein
TRINITY_DN22467_c4_g1	AT4G36920	829845	ensembl_gene_id	A. thaliana	AP2	Integrase-type DNA-binding superfamily protein
TRINITY_DN22539_c1_g1	AT1G78560	844192	ensembl_gene_id	A. thaliana	AT1G78560	Sodium Bile acid symporter family
TRINITY_DN22539_c1_g1	AT2G26900	817231	ensembl_gene_id	A. thaliana	BASS2	Sodium Bile acid symporter family
TRINITY_DN22539_c1_g1	AT4G12030	826811	ensembl_gene_id	A. thaliana	BAT5	bile acid transporter 5
TRINITY_DN22539_c1_g1	AT3G25410	822125	ensembl_gene_id	A. thaliana	AT3G25410	Sodium Bile acid symporter family
TRINITY_DN22627_c0_g1	AT3G61180	825290	ensembl_gene_id	A. thaliana	AT3G61180	RING/U-box superfamily protein
TRINITY_DN22627_c0_g1	AT4G11680	826773	ensembl_gene_id	A. thaliana	AT4G11680	Zinc finger, C3HC4 type (RING finger) family protein
TRINITY_DN22627_c0_g1	AT1G12760	837832	ensembl_gene_id	A. thaliana	AT1G12760	Zinc finger, C3HC4 type (RING finger) family protein
TRINITY_DN22709_c3_g1	AT1G72550	843587	ensembl_gene_id	A. thaliana	AT1G72550	tRNA synthetase beta subunit family protein
TRINITY_DN22709_c3_g1	AT3G19840	821521	ensembl_gene_id	A. thaliana	PRP40C	pre-mRNA-processing protein 40C
TRINITY_DN22709_c3_g1	AT4G00900	827984	ensembl_gene_id	A. thaliana	ECA2	ER-type Ca2+-ATPase 2
TRINITY_DN22729_c0_g1	AT2G44260	819034	ensembl_gene_id	A. thaliana	AT2G44260	DUF946 family protein (DUF946)
TRINITY_DN22729_c0_g1	AT2G44230	819031	ensembl_gene_id	A. thaliana	AT2G44230	hypothetical protein (DUF946)
TRINITY_DN22729_c0_g1	AT3G01870	821315	ensembl_gene_id	A. thaliana	AT3G01870	hypothetical protein (DUF946)
TRINITY_DN22729_c0_g1	AT5G18490	831967	ensembl_gene_id	A. thaliana	AT5G18490	vacuolar sorting-associated protein (DUF946)
TRINITY_DN22769_c1_g1	AT3G56470	824814	ensembl_gene_id	A. thaliana	AT3G56470	F-box family protein
TRINITY_DN22769_c1_g1	AT1G49360	841359	ensembl_gene_id	A. thaliana	AT1G49360	F-box family protein
TRINITY_DN22804_c7_g1	AT1G25220	839103	ensembl_gene_id	A. thaliana	ASB1	anthranilate synthase beta subunit 1
TRINITY_DN22804_c7_g1	AT1G25155	839099	ensembl_gene_id	A. thaliana	AT1G25155	Glutamine amidotransferase type 1 family protein
TRINITY_DN22804_c7_g1	AT1G25083	839095	ensembl_gene_id	A. thaliana	AT1G25083	Glutamine amidotransferase type 1 family protein
TRINITY_DN22804_c7_g1	AT1G24909	839089	ensembl_gene_id	A. thaliana	AT1G24909	Glutamine amidotransferase type 1 family protein
TRINITY_DN22804_c7_g1	AT5G57890	835900	ensembl_gene_id	A. thaliana	AT5G57890	Glutamine amidotransferase type 1 family protein
TRINITY_DN22824_c1_g1	AT4G25434	828648	ensembl_gene_id	A. thaliana	NUDT10	nudix hydrolase homolog 10
TRINITY_DN22873_c1_g1	AT5G57685	835875	ensembl_gene_id	A. thaliana	GDU3	glutamine dumper 3
TRINITY_DN22873_c1_g1	AT4G25760	828681	ensembl_gene_id	A. thaliana	GDU2	glutamine dumper 2
TRINITY_DN22873_c1_g1	AT4G31730	829301	ensembl_gene_id	A. thaliana	GDU1	glutamine dumper 1
TRINITY_DN22873_c1_g1	AT2G24762	817013	ensembl_gene_id	A. thaliana	GDU4	glutamine dumper 4
TRINITY_DN22873_c1_g1	AT5G24920	832562	ensembl_gene_id	A. thaliana	GDU5	glutamine dumper 5
TRINITY_DN22923_c3_g1	AT3G24050	821990	ensembl_gene_id	A. thaliana	GATA1	GATA transcription factor 1
TRINITY_DN22923_c3_g1	AT4G32890	829425	ensembl_gene_id	A. thaliana	GATA9	GATA transcription factor 9
TRINITY_DN22923_c3_g1	AT3G60530	825224	ensembl_gene_id	A. thaliana	GATA4	GATA transcription factor 4
TRINITY_DN22923_c3_g1	AT1G08010	837316	ensembl_gene_id	A. thaliana	GATA11	GATA transcription factor 11
TRINITY_DN22972_c4_g2	AT3G03880	821095	ensembl_gene_id	A. thaliana	AT3G03880	sterol O-acyltransferase, putative (DUF1639)
TRINITY_DN22972_c4_g2	AT1G55340	841980	ensembl_gene_id	A. thaliana	AT1G55340	hypothetical protein (DUF1639)
TRINITY_DN22972_c4_g2	AT4G20300	827777	ensembl_gene_id	A. thaliana	AT4G20300	Serine/Threonine-kinase, putative (DUF1639)
TRINITY_DN23017_c2_g2	AT3G26744	822287	ensembl_gene_id	A. thaliana	ICE1	basic helix-loop-helix (bHLH) DNA-binding superfamily protein
TRINITY_DN23017_c2_g2	AT1G12860	837843	ensembl_gene_id	A. thaliana	SCRM2	basic helix-loop-helix (bHLH) DNA-binding superfamily protein
TRINITY_DN23036_c0_g1	AT1G07360	837248	ensembl_gene_id	A. thaliana	MAC5A	CCCH-type zinc fingerfamily protein with RNA-binding domain-containing protein
TRINITY_DN23036_c0_g1	AT2G29580	817507	ensembl_gene_id	A. thaliana	MAC5B	CCCH-type zinc fingerfamily protein with RNA-binding domain-containing protein
TRINITY_DN23036_c0_g1	AT5G04210	830300	ensembl_gene_id	A. thaliana	AT5G04210	CCCH-type zinc fingerfamily protein with RNA-binding domain-containing protein
TRINITY_DN23036_c0_g1	AT5G07060	830597	ensembl_gene_id	A. thaliana	MAC5C	CCCH-type zinc fingerfamily protein with RNA-binding domain-containing protein
TRINITY_DN23086_c3_g4	AT1G76510	843984	ensembl_gene_id	A. thaliana	AT1G76510	ARID/BRIGHT DNA-binding domain-containing protein
TRINITY_DN23086_c3_g4	AT1G20910	838684	ensembl_gene_id	A. thaliana	AT1G20910	ARID/BRIGHT DNA-binding domain-containing protein
TRINITY_DN23100_c3_g1	AT1G64710	842779	ensembl_gene_id	A. thaliana	AT1G64710	GroES-like zinc-binding alcohol dehydrogenase family protein
TRINITY_DN23100_c3_g1	AT1G32780	840172	ensembl_gene_id	A. thaliana	AT1G32780	GroES-like zinc-binding dehydrogenase family protein
TRINITY_DN23100_c3_g1	AT1G77120	844047	ensembl_gene_id	A. thaliana	ADH1	alcohol dehydrogenase 1
TRINITY_DN23100_c3_g1	AT5G43940	834417	ensembl_gene_id	A. thaliana	HOT5	GroES-like zinc-binding dehydrogenase family protein
TRINITY_DN23124_c1_g1	AT3G51290	824292	ensembl_gene_id	A. thaliana	AT3G51290	pyridoxal-phosphate-dependent serine hydroxymethyltransferase, putative (DUF632)
TRINITY_DN23124_c1_g1	AT5G03100	831808	ensembl_gene_id	A. thaliana	AT5G03100	F-box/RNI-like superfamily protein
TRINITY_DN23203_c0_g1	AT3G25970	822194	ensembl_gene_id	A. thaliana	AT3G25970	Pentatricopeptide repeat (PPR) superfamily protein
TRINITY_DN23203_c0_g1	AT2G13600	815845	ensembl_gene_id	A. thaliana	SLO2	Pentatricopeptide repeat (PPR) superfamily protein
TRINITY_DN23203_c0_g1	AT4G02750	828187	ensembl_gene_id	A. thaliana	AT4G02750	Tetratricopeptide repeat (TPR)-like superfamily protein
TRINITY_DN23203_c0_g1	AT3G22690	821840	ensembl_gene_id	A. thaliana	AT3G22690	LOW protein: PPR containing-like protein
TRINITY_DN23224_c2_g2	AT2G01910	814722	ensembl_gene_id	A. thaliana	ATMAP65-6	Microtubule associated protein (MAP65/ASE1) family protein
TRINITY_DN23224_c2_g2	AT1G14690	838034	ensembl_gene_id	A. thaliana	MAP65-7	microtubule-associated protein 65-7
TRINITY_DN23224_c2_g2	AT5G55230	835616	ensembl_gene_id	A. thaliana	MAP65-1	microtubule-associated proteins 65-1
TRINITY_DN23308_c4_g1	AT5G63320	836452	ensembl_gene_id	A. thaliana	NPX1	nuclear protein X1
TRINITY_DN23308_c4_g1	AT3G07790	819970	ensembl_gene_id	A. thaliana	AT3G07790	DGCR14-like protein
TRINITY_DN23308_c4_g1	AT3G05570	819723	ensembl_gene_id	A. thaliana	AT3G05570	dipeptide transport ATP-binding protein
TRINITY_DN23321_c0_g1	AT5G17880	831656	ensembl_gene_id	A. thaliana	CSA1	disease resistance protein (TIR-NBS-LRR class)
TRINITY_DN23321_c0_g1	AT2G14080	815893	ensembl_gene_id	A. thaliana	AT2G14080	Disease resistance protein (TIR-NBS-LRR class) family
TRINITY_DN23321_c0_g1	AT3G44480	823573	ensembl_gene_id	A. thaliana	RPP1	Disease resistance protein (TIR-NBS-LRR class) family
TRINITY_DN23332_c5_g2	AT5G05270	830409	ensembl_gene_id	A. thaliana	CHIL	Chalcone-flavanone isomerase family protein
TRINITY_DN23332_c5_g2	AT1G53520	841787	ensembl_gene_id	A. thaliana	FAP3	Chalcone-flavanone isomerase family protein
TRINITY_DN23332_c5_g2	AT3G55120	824678	ensembl_gene_id	A. thaliana	TT5	Chalcone-flavanone isomerase family protein
TRINITY_DN23332_c5_g2	AT5G66230	836755	ensembl_gene_id	A. thaliana	AT5G66230	Chalcone-flavanone isomerase family protein
TRINITY_DN23343_c0_g1	AT2G18370	816352	ensembl_gene_id	A. thaliana	AT2G18370	Bifunctional inhibitor/lipid-transfer protein/seed storage 2S albumin superfamily protein
TRINITY_DN23343_c0_g1	AT5G59310	836050	ensembl_gene_id	A. thaliana	LTP4	lipid transfer protein 4
TRINITY_DN23343_c0_g1	AT5G59320	836051	ensembl_gene_id	A. thaliana	LTP3	lipid transfer protein 3
TRINITY_DN23343_c0_g1	AT2G38540	818436	ensembl_gene_id	A. thaliana	LP1	lipid transfer protein 1
TRINITY_DN23343_c0_g1	AT3G08770	820024	ensembl_gene_id	A. thaliana	LTP6	lipid transfer protein 6
TRINITY_DN23378_c0_g1	AT5G51560	835230	ensembl_gene_id	A. thaliana	AT5G51560	Leucine-rich repeat protein kinase family protein
TRINITY_DN23378_c0_g1	AT2G45340	819142	ensembl_gene_id	A. thaliana	AT2G45340	Leucine-rich repeat protein kinase family protein
TRINITY_DN23378_c0_g1	AT4G22730	828369	ensembl_gene_id	A. thaliana	AT4G22730	Leucine-rich repeat protein kinase family protein
TRINITY_DN23378_c0_g1	AT5G07280	830619	ensembl_gene_id	A. thaliana	EMS1	Leucine-rich repeat transmembrane protein kinase
TRINITY_DN23404_c1_g3	AT4G29410	829062	ensembl_gene_id	A. thaliana	AT4G29410	Ribosomal L28e protein family
TRINITY_DN23404_c1_g3	AT2G19730	816492	ensembl_gene_id	A. thaliana	AT2G19730	Ribosomal L28e protein family
TRINITY_DN23405_c0_g2	AT1G54570	841899	ensembl_gene_id	A. thaliana	PES1	Esterase/lipase/thioesterase family protein
TRINITY_DN23405_c0_g2	AT3G26840	822299	ensembl_gene_id	A. thaliana	PES2	Esterase/lipase/thioesterase family protein
TRINITY_DN23405_c0_g2	AT5G41120	834114	ensembl_gene_id	A. thaliana	AT5G41120	Esterase/lipase/thioesterase family protein
TRINITY_DN23409_c7_g2	AT3G22670	821838	ensembl_gene_id	A. thaliana	AT3G22670	Pentatricopeptide repeat (PPR) superfamily protein
TRINITY_DN23409_c7_g2	AT3G04130	819568	ensembl_gene_id	A. thaliana	AT3G04130	Tetratricopeptide repeat (TPR)-like superfamily protein
TRINITY_DN23409_c7_g2	AT1G71060	843446	ensembl_gene_id	A. thaliana	AT1G71060	Tetratricopeptide repeat (TPR)-like superfamily protein
TRINITY_DN23409_c7_g2	AT1G77360	844072	ensembl_gene_id	A. thaliana	APPR6	Tetratricopeptide repeat (TPR)-like superfamily protein
TRINITY_DN23430_c3_g2	AT4G32030	829334	ensembl_gene_id	A. thaliana	AT4G32030	hypothetical protein
TRINITY_DN23430_c3_g2	AT1G80610	844400	ensembl_gene_id	A. thaliana	AT1G80610	hypothetical protein
TRINITY_DN23430_c3_g2	AT1G15800	838149	ensembl_gene_id	A. thaliana	AT1G15800	hypothetical protein
TRINITY_DN23430_c3_g2	AT5G25210	832592	ensembl_gene_id	A. thaliana	AT5G25210	hypothetical protein
TRINITY_DN23459_c3_g1	AT5G17990	831666	ensembl_gene_id	A. thaliana	TRP1	tryptophan biosynthesis 1
TRINITY_DN23459_c3_g1	AT1G70570	843394	ensembl_gene_id	A. thaliana	AT1G70570	anthranilate phosphoribosyltransferase
TRINITY_DN23459_c3_g1	AT2G45330	819141	ensembl_gene_id	A. thaliana	emb1067	RNA 2'-phosphotransferase, Tpt1 / KptA family
TRINITY_DN23459_c3_g1	AT5G23600	832426	ensembl_gene_id	A. thaliana	AT5G23600	RNA 2'-phosphotransferase, Tpt1 / KptA family
TRINITY_DN23556_c5_g1	AT4G26760	828783	ensembl_gene_id	A. thaliana	MAP65-2	microtubule-associated protein 65-2
TRINITY_DN23590_c1_g3	AT5G58510	835964	ensembl_gene_id	A. thaliana	AT5G58510	Rab3 GTPase-activating protein catalytic protein
TRINITY_DN23631_c0_g4	AT3G14980	820727	ensembl_gene_id	A. thaliana	ROS4	Acyl-CoA N-acyltransferase with RING/FYVE/PHD-type zinc finger protein
TRINITY_DN23702_c1_g1	AT1G20760	838666	ensembl_gene_id	A. thaliana	AT1G20760	Calcium-binding EF hand family protein
TRINITY_DN23702_c1_g1	AT1G21630	838765	ensembl_gene_id	A. thaliana	AT1G21630	Calcium-binding EF hand family protein
TRINITY_DN23713_c2_g1	AT2G24220	816956	ensembl_gene_id	A. thaliana	PUP5	purine permease 5
TRINITY_DN23713_c2_g1	AT1G28230	839717	ensembl_gene_id	A. thaliana	PUP1	purine permease 1
TRINITY_DN23713_c2_g1	AT1G28220	839716	ensembl_gene_id	A. thaliana	PUP3	purine permease 3
TRINITY_DN23713_c2_g1	AT4G18220	827548	ensembl_gene_id	A. thaliana	AT4G18220	Drug/metabolite transporter superfamily protein
TRINITY_DN23795_c0_g1	AT4G38060	829962	ensembl_gene_id	A. thaliana	AT4G38060	hypothetical protein
TRINITY_DN23795_c0_g1	AT5G65480	836673	ensembl_gene_id	A. thaliana	AT5G65480	hypothetical protein
TRINITY_DN23799_c5_g1	AT3G14460	820669	ensembl_gene_id	A. thaliana	AT3G14460	LRR and NB-ARC domains-containing disease resistance protein
TRINITY_DN23799_c5_g1	AT5G46510	834694	ensembl_gene_id	A. thaliana	AT5G46510	Disease resistance protein (TIR-NBS-LRR class) family
TRINITY_DN23799_c5_g1	AT5G46520	834695	ensembl_gene_id	A. thaliana	AT5G46520	Disease resistance protein (TIR-NBS-LRR class) family
TRINITY_DN23817_c5_g10	AT2G44020	819007	ensembl_gene_id	A. thaliana	AT2G44020	Mitochondrial transcription termination factor family protein
TRINITY_DN23817_c5_g10	AT4G02990	828116	ensembl_gene_id	A. thaliana	BSM	Mitochondrial transcription termination factor family protein
TRINITY_DN23817_c5_g10	AT2G21710	816708	ensembl_gene_id	A. thaliana	EMB2219	Mitochondrial transcription termination factor family protein
TRINITY_DN23851_c0_g2	AT1G76650	843998	ensembl_gene_id	A. thaliana	CML38	calmodulin-like 38
TRINITY_DN23851_c0_g2	AT5G10800	830947	ensembl_gene_id	A. thaliana	AT5G10800	RNA recognition motif (RRM)-containing protein
TRINITY_DN23866_c3_g2	AT5G62740	836395	ensembl_gene_id	A. thaliana	HIR1	SPFH/Band 7/PHB domain-containing membrane-associated protein family
TRINITY_DN23866_c3_g2	AT3G01290	821309	ensembl_gene_id	A. thaliana	HIR2	SPFH/Band 7/PHB domain-containing membrane-associated protein family
TRINITY_DN23866_c3_g2	AT1G69840	843320	ensembl_gene_id	A. thaliana	AT1G69840	SPFH/Band 7/PHB domain-containing membrane-associated protein family
TRINITY_DN23963_c1_g4	AT4G36150	829772	ensembl_gene_id	A. thaliana	AT4G36150	Disease resistance protein (TIR-NBS-LRR class) family
TRINITY_DN23963_c1_g4	AT4G12010	826809	ensembl_gene_id	A. thaliana	AT4G12010	Disease resistance protein (TIR-NBS-LRR class) family
TRINITY_DN23963_c1_g4	AT5G17680	831634	ensembl_gene_id	A. thaliana	AT5G17680	disease resistance protein (TIR-NBS-LRR class)
TRINITY_DN23963_c1_g4	AT3G25510	822137	ensembl_gene_id	A. thaliana	AT3G25510	disease resistance protein (TIR-NBS-LRR class) family protein
TRINITY_DN23973_c0_g1	AT1G10970	837640	ensembl_gene_id	A. thaliana	ZIP4	zinc transporter
TRINITY_DN23973_c0_g1	AT1G60960	842387	ensembl_gene_id	A. thaliana	IRT3	iron regulated transporter 3
TRINITY_DN24069_c0_g1	AT4G19610	827703	ensembl_gene_id	A. thaliana	AT4G19610	nucleotide/nucleic acid binding protein
TRINITY_DN24069_c0_g1	AT5G08695	6241377	ensembl_gene_id	A. thaliana	AT5G08695	RNA-binding (RRM/RBD/RNP motifs) family protein
TRINITY_DN24069_c0_g1	AT5G05720	830456	ensembl_gene_id	A. thaliana	AT5G05720	RNA-binding (RRM/RBD/RNP motifs) family protein
TRINITY_DN24069_c0_g1	AT1G49760	841399	ensembl_gene_id	A. thaliana	PAB8	poly(A) binding protein 8
TRINITY_DN24087_c2_g2	AT5G60160	836138	ensembl_gene_id	A. thaliana	AT5G60160	Zn-dependent exopeptidases superfamily protein
TRINITY_DN24087_c2_g2	AT5G04710	830349	ensembl_gene_id	A. thaliana	AT5G04710	Zn-dependent exopeptidases superfamily protein
TRINITY_DN24087_c2_g2	AT1G73990	843737	ensembl_gene_id	A. thaliana	SPPA	signal peptide peptidase
TRINITY_DN24087_c2_g2	AT1G49340	841357	ensembl_gene_id	A. thaliana	ATPI4K ALPHA	Phosphatidylinositol 3- and 4-kinase family protein
TRINITY_DN24111_c0_g3	AT3G44750	823605	ensembl_gene_id	A. thaliana	HDA3	histone deacetylase 3
TRINITY_DN24111_c0_g3	AT5G03740	831733	ensembl_gene_id	A. thaliana	HD2C	histone deacetylase 2C
TRINITY_DN24111_c0_g3	AT5G22650	832328	ensembl_gene_id	A. thaliana	HD2B	histone deacetylase 2B
TRINITY_DN24190_c2_g1	AT2G01710	814700	ensembl_gene_id	A. thaliana	AT2G01710	Chaperone DnaJ-domain superfamily protein
TRINITY_DN24190_c2_g1	AT5G64360	836557	ensembl_gene_id	A. thaliana	EIP9	Chaperone DnaJ-domain superfamily protein
TRINITY_DN24207_c0_g5	AT1G44170	841020	ensembl_gene_id	A. thaliana	ALDH3H1	aldehyde dehydrogenase 3H1
TRINITY_DN24207_c0_g5	AT4G34240	829573	ensembl_gene_id	A. thaliana	ALDH3I1	aldehyde dehydrogenase 3I1
TRINITY_DN24247_c5_g2	AT1G79750	844314	ensembl_gene_id	A. thaliana	NADP-ME4	NADP-malic enzyme 4
TRINITY_DN24247_c5_g2	AT5G11670	831039	ensembl_gene_id	A. thaliana	NADP-ME2	NADP-malic enzyme 2
TRINITY_DN24247_c5_g2	AT5G25880	832657	ensembl_gene_id	A. thaliana	NADP-ME3	NADP-malic enzyme 3
TRINITY_DN24259_c2_g1	AT5G67610	836897	ensembl_gene_id	A. thaliana	AT5G67610	transmembrane protein (DUF2215)
TRINITY_DN24259_c2_g1	AT3G49840	824146	ensembl_gene_id	A. thaliana	AT3G49840	transmembrane protein (DUF2215)
TRINITY_DN24259_c2_g1	AT1G28760	839772	ensembl_gene_id	A. thaliana	AT1G28760	guanosine-3',5'-bis (diphosphate) 3'-pyrophosphohydrolase, putative (DUF2215)
TRINITY_DN24285_c0_g1	AT3G16857	820940	ensembl_gene_id	A. thaliana	RR1	response regulator 1
TRINITY_DN24285_c0_g1	AT4G16110	827297	ensembl_gene_id	A. thaliana	RR2	response regulator 2
TRINITY_DN24285_c0_g1	AT2G25180	817056	ensembl_gene_id	A. thaliana	RR12	response regulator 12
TRINITY_DN24299_c1_g4	AT2G17260	816231	ensembl_gene_id	A. thaliana	GLR2	glutamate receptor 2
TRINITY_DN24299_c1_g4	AT4G35290	829682	ensembl_gene_id	A. thaliana	GLUR2	glutamate receptor 2
TRINITY_DN24329_c1_g3	AT2G37570	818333	ensembl_gene_id	A. thaliana	SLT1	HSP20-like chaperones superfamily protein
TRINITY_DN24329_c1_g3	AT5G02480	831883	ensembl_gene_id	A. thaliana	AT5G02480	HSP20-like chaperones superfamily protein
TRINITY_DN24329_c1_g3	AT3G12570	820437	ensembl_gene_id	A. thaliana	FYD	FYD
TRINITY_DN24462_c5_g1	AT5G56230	835722	ensembl_gene_id	A. thaliana	PRA1.G2	prenylated RAB acceptor 1.G2
TRINITY_DN24462_c5_g1	AT1G55640	842013	ensembl_gene_id	A. thaliana	PRA1.G1	prenylated RAB acceptor 1.G1
TRINITY_DN24462_c5_g1	AT5G01640	831708	ensembl_gene_id	A. thaliana	PRA1.B5	prenylated RAB acceptor 1.B5
TRINITY_DN24462_c5_g1	AT2G38360	818416	ensembl_gene_id	A. thaliana	PRA1.B4	prenylated RAB acceptor 1.B4
TRINITY_DN24462_c5_g1	AT2G40380	818631	ensembl_gene_id	A. thaliana	PRA1.B2	prenylated RAB acceptor 1.B2
TRINITY_DN24468_c2_g3	AT5G20160	832138	ensembl_gene_id	A. thaliana	AT5G20160	Ribosomal protein L7Ae/L30e/S12e/Gadd45 family protein
TRINITY_DN24468_c2_g3	AT4G22380	828333	ensembl_gene_id	A. thaliana	AT4G22380	Ribosomal protein L7Ae/L30e/S12e/Gadd45 family protein
TRINITY_DN24468_c2_g3	AT4G12600	826873	ensembl_gene_id	A. thaliana	AT4G12600	Ribosomal protein L7Ae/L30e/S12e/Gadd45 family protein
TRINITY_DN24471_c4_g4	AT5G09310	830790	ensembl_gene_id	A. thaliana	AT5G09310	gamma-secretase subunit
TRINITY_DN24471_c4_g4	AT1G45160	841084	ensembl_gene_id	A. thaliana	AT1G45160	Protein kinase superfamily protein
TRINITY_DN24471_c4_g4	AT4G04650	825798	ensembl_gene_id	A. thaliana	AT4G04650	RNA-directed DNA polymerase (reverse transcriptase)-related family protein
TRINITY_DN24471_c4_g4	AT4G00930	827980	ensembl_gene_id	A. thaliana	CIP4.1	COP1-interacting protein 4.1
TRINITY_DN24498_c0_g2	AT3G53180	824484	ensembl_gene_id	A. thaliana	NodGS	nodulin/glutamine synthase-like protein
TRINITY_DN24498_c0_g2	AT5G16570	831519	ensembl_gene_id	A. thaliana	GLN1;4	glutamine synthetase 1;4
TRINITY_DN24498_c0_g2	AT1G66200	842935	ensembl_gene_id	A. thaliana	GSR2	hypothetical protein
TRINITY_DN24498_c0_g2	AT5G58140	835926	ensembl_gene_id	A. thaliana	PHOT2	phototropin 2
TRINITY_DN24540_c1_g1	AT1G47480	841155	ensembl_gene_id	A. thaliana	AT1G47480	alpha/beta-Hydrolases superfamily protein
TRINITY_DN24540_c1_g1	AT2G03550	814884	ensembl_gene_id	A. thaliana	AT2G03550	alpha/beta-Hydrolases superfamily protein
TRINITY_DN24540_c1_g1	AT3G48700	824031	ensembl_gene_id	A. thaliana	CXE13	carboxyesterase 13
TRINITY_DN24540_c1_g1	AT3G48690	824030	ensembl_gene_id	A. thaliana	CXE12	alpha/beta-Hydrolases superfamily protein
TRINITY_DN24540_c1_g1	AT1G19190	838502	ensembl_gene_id	A. thaliana	AT1G19190	alpha/beta-Hydrolases superfamily protein
TRINITY_DN24567_c0_g1	AT4G16480	827346	ensembl_gene_id	A. thaliana	INT4	inositol transporter 4
TRINITY_DN24567_c0_g1	AT2G35740	818146	ensembl_gene_id	A. thaliana	INT3	nositol transporter 3
TRINITY_DN24567_c0_g1	AT1G30220	839902	ensembl_gene_id	A. thaliana	INT2	inositol transporter 2
TRINITY_DN24641_c5_g1	AT1G21080	838704	ensembl_gene_id	A. thaliana	AT1G21080	DNAJ heat shock N-terminal domain-containing protein
TRINITY_DN24641_c5_g1	AT1G76700	844003	ensembl_gene_id	A. thaliana	AT1G76700	DNAJ heat shock N-terminal domain-containing protein
TRINITY_DN24641_c5_g1	AT1G77020	844038	ensembl_gene_id	A. thaliana	AT1G77020	DNAJ heat shock N-terminal domain-containing protein
TRINITY_DN24643_c0_g6	AT4G13750	827009	ensembl_gene_id	A. thaliana	NOV	Histidine kinase-, DNA gyrase B-, and HSP90-like ATPase family protein
TRINITY_DN24643_c0_g6	AT3G10550	820220	ensembl_gene_id	A. thaliana	MTM1	Myotubularin-like phosphatases II superfamily
TRINITY_DN24643_c0_g6	AT5G04540	830333	ensembl_gene_id	A. thaliana	MTM2	Myotubularin-like phosphatases II superfamily
TRINITY_DN24781_c1_g3	AT5G26330	832702	ensembl_gene_id	A. thaliana	AT5G26330	Cupredoxin superfamily protein
TRINITY_DN24781_c1_g3	AT2G31050	817657	ensembl_gene_id	A. thaliana	AT2G31050	Cupredoxin superfamily protein
TRINITY_DN24781_c1_g3	AT2G26720	817213	ensembl_gene_id	A. thaliana	AT2G26720	Cupredoxin superfamily protein
TRINITY_DN24781_c1_g3	AT2G32300	817791	ensembl_gene_id	A. thaliana	UCC1	uclacyanin 1
TRINITY_DN24798_c0_g2	AT1G15950	838165	ensembl_gene_id	A. thaliana	CCR1	cinnamoyl coa reductase 1
TRINITY_DN24860_c2_g1	AT5G28540	832950	ensembl_gene_id	A. thaliana	BIP1	heat shock protein 70 (Hsp 70) family protein
TRINITY_DN24860_c2_g1	AT5G42020	834207	ensembl_gene_id	A. thaliana	BIP2	Heat shock protein 70 (Hsp 70) family protein
TRINITY_DN24860_c2_g1	AT1G09080	837429	ensembl_gene_id	A. thaliana	BIP3	Heat shock protein 70 (Hsp 70) family protein
TRINITY_DN24925_c3_g1	AT4G19810	827725	ensembl_gene_id	A. thaliana	ChiC	Glycosyl hydrolase family protein with chitinase insertion domain-containing protein
TRINITY_DN24925_c3_g1	AT4G19820	827726	ensembl_gene_id	A. thaliana	AT4G19820	Glycosyl hydrolase family protein with chitinase insertion domain-containing protein
TRINITY_DN24925_c3_g1	AT4G19800	827724	ensembl_gene_id	A. thaliana	AT4G19800	Glycosyl hydrolase family protein with chitinase insertion domain-containing protein
TRINITY_DN24925_c3_g1	AT4G19720	827716	ensembl_gene_id	A. thaliana	AT4G19720	Glycosyl hydrolase family protein with chitinase insertion domain-containing protein
TRINITY_DN24941_c2_g1	AT5G48050	834857	ensembl_gene_id	A. thaliana	AT5G48050	Copia-like polyprotein/retrotransposon
TRINITY_DN24941_c2_g1	AT1G34070	840305	ensembl_gene_id	A. thaliana	AT1G34070	Copia-like polyprotein/retrotransposon
TRINITY_DN24941_c2_g1	AT1G21280	838724	ensembl_gene_id	A. thaliana	AT1G21280	Copia-like polyprotein/retrotransposon
TRINITY_DN24941_c2_g1	AT3G63460	825521	ensembl_gene_id	A. thaliana	AT3G63460	transducin family protein / WD-40 repeat family protein
TRINITY_DN24941_c3_g3	AT3G53140	824480	ensembl_gene_id	A. thaliana	AT3G53140	O-methyltransferase family protein
TRINITY_DN24941_c3_g3	AT1G72300	843562	ensembl_gene_id	A. thaliana	PSY1R	Leucine-rich receptor-like protein kinase family protein
TRINITY_DN24941_c3_g3	AT3G23660	821946	ensembl_gene_id	A. thaliana	AT3G23660	Sec23/Sec24 protein transport family protein
TRINITY_DN24941_c3_g3	AT1G17240	838295	ensembl_gene_id	A. thaliana	RLP2	receptor like protein 2
TRINITY_DN24944_c3_g1	AT1G06720	837182	ensembl_gene_id	A. thaliana	AT1G06720	P-loop containing nucleoside triphosphate hydrolases superfamily protein
TRINITY_DN24944_c3_g1	AT1G42440	840848	ensembl_gene_id	A. thaliana	AT1G42440	pre-rRNA-processing TSR1-like protein
TRINITY_DN25066_c5_g1	AT1G09160	837436	ensembl_gene_id	A. thaliana	AT1G09160	Protein phosphatase 2C family protein
TRINITY_DN25066_c5_g1	AT1G68410	843170	ensembl_gene_id	A. thaliana	AT1G68410	Protein phosphatase 2C family protein
TRINITY_DN25119_c0_g3	AT2G33820	817949	ensembl_gene_id	A. thaliana	MBAC1	Mitochondrial substrate carrier family protein
TRINITY_DN25119_c0_g3	AT5G46800	834724	ensembl_gene_id	A. thaliana	BOU	Mitochondrial substrate carrier family protein
TRINITY_DN25204_c11_g1	AT5G64150	836536	ensembl_gene_id	A. thaliana	AT5G64150	RNA methyltransferase family protein
TRINITY_DN25204_c11_g1	AT3G13440	820545	ensembl_gene_id	A. thaliana	AT3G13440	S-adenosyl-L-methionine-dependent methyltransferases superfamily protein
TRINITY_DN25204_c11_g1	AT1G45231	841092	ensembl_gene_id	A. thaliana	AT1G45231	S-adenosyl-L-methionine-dependent methyltransferases superfamily protein
TRINITY_DN25216_c2_g4	AT1G14280	837989	ensembl_gene_id	A. thaliana	PKS2	phytochrome kinase substrate 2
TRINITY_DN25216_c2_g4	AT2G02950	814823	ensembl_gene_id	A. thaliana	PKS1	phytochrome kinase substrate 1
TRINITY_DN25216_c2_g4	AT1G18810	838463	ensembl_gene_id	A. thaliana	AT1G18810	phytochrome kinase substrate-like protein
TRINITY_DN25216_c2_g4	AT5G04190	830297	ensembl_gene_id	A. thaliana	PKS4	phytochrome kinase substrate 4
TRINITY_DN25216_c2_g4	AT3G07170	819904	ensembl_gene_id	A. thaliana	AT3G07170	Sterile alpha motif (SAM) domain-containing protein
TRINITY_DN25241_c3_g1	AT4G03220	828021	ensembl_gene_id	A. thaliana	AT4G03220	Protein with RNI-like/FBD-like domain
TRINITY_DN25241_c3_g1	AT5G22600	832323	ensembl_gene_id	A. thaliana	AT5G22600	FBD / Leucine Rich Repeat domains containing protein
TRINITY_DN25241_c3_g1	AT5G22730	832336	ensembl_gene_id	A. thaliana	AT5G22730	F-box/RNI-like/FBD-like domains-containing protein
TRINITY_DN25278_c2_g2	AT5G50170	835082	ensembl_gene_id	A. thaliana	AT5G50170	C2 calcium/lipid-binding and GRAM domain containing protein
TRINITY_DN25278_c2_g2	AT1G03370	839519	ensembl_gene_id	A. thaliana	AT1G03370	C2 calcium/lipid-binding and GRAM domain containing protein
TRINITY_DN25278_c2_g2	AT3G59660	825135	ensembl_gene_id	A. thaliana	AT3G59660	C2 domain-containing protein / GRAM domain-containing protein
TRINITY_DN25310_c1_g1	AT1G75310	843868	ensembl_gene_id	A. thaliana	AUL1	auxin-like 1 protein
TRINITY_DN25310_c1_g1	AT4G36520	829804	ensembl_gene_id	A. thaliana	AT4G36520	Chaperone DnaJ-domain superfamily protein
TRINITY_DN25310_c1_g1	AT4G12770	826889	ensembl_gene_id	A. thaliana	AT4G12770	Chaperone DnaJ-domain superfamily protein
TRINITY_DN25336_c0_g5	AT2G17220	816227	ensembl_gene_id	A. thaliana	Kin3	Protein kinase superfamily protein
TRINITY_DN25336_c0_g5	AT3G20530	821599	ensembl_gene_id	A. thaliana	AT3G20530	Protein kinase superfamily protein
TRINITY_DN25336_c0_g5	AT1G76360	843968	ensembl_gene_id	A. thaliana	AT1G76360	Protein kinase superfamily protein
TRINITY_DN25336_c0_g5	AT1G61860	842483	ensembl_gene_id	A. thaliana	AT1G61860	Protein kinase superfamily protein
TRINITY_DN25415_c1_g1	AT3G21820	821736	ensembl_gene_id	A. thaliana	ATXR2	histone-lysine N-methyltransferase ATXR2
TRINITY_DN25415_c1_g1	AT2G17900	816300	ensembl_gene_id	A. thaliana	SDG37	SET domain group 37
TRINITY_DN25415_c1_g1	AT2G19640	816483	ensembl_gene_id	A. thaliana	ASHR2	ASH1-related protein 2
TRINITY_DN25415_c1_g1	AT1G26760	839217	ensembl_gene_id	A. thaliana	SDG35	SET domain protein 35
TRINITY_DN25420_c0_g2	AT3G14660	820694	ensembl_gene_id	A. thaliana	CYP72A13	cytochrome P450, family 72, subfamily A, polypeptide 13
TRINITY_DN25420_c0_g2	AT3G14690	820697	ensembl_gene_id	A. thaliana	CYP72A15	cytochrome P450, family 72, subfamily A, polypeptide 15
TRINITY_DN25420_c0_g2	AT3G14680	820696	ensembl_gene_id	A. thaliana	CYP72A14	cytochrome P450, family 72, subfamily A, polypeptide 14
TRINITY_DN25431_c5_g3	AT1G80530	844392	ensembl_gene_id	A. thaliana	AT1G80530	Major facilitator superfamily protein
TRINITY_DN25431_c5_g3	AT4G34950	829647	ensembl_gene_id	A. thaliana	AT4G34950	Major facilitator superfamily protein
TRINITY_DN25431_c5_g3	AT2G16660	816167	ensembl_gene_id	A. thaliana	AT2G16660	Major facilitator superfamily protein
TRINITY_DN25431_c5_g3	AT5G14120	831262	ensembl_gene_id	A. thaliana	AT5G14120	Major facilitator superfamily protein
TRINITY_DN25431_c5_g3	AT3G01930	821218	ensembl_gene_id	A. thaliana	AT3G01930	Major facilitator superfamily protein
TRINITY_DN25445_c0_g1	AT4G00355	827659	ensembl_gene_id	A. thaliana	ATI2	mesoderm induction early response protein
TRINITY_DN25445_c0_g1	AT2G45980	819206	ensembl_gene_id	A. thaliana	ATI1	mesoderm induction early response protein
TRINITY_DN25529_c8_g1	AT5G57360	835842	ensembl_gene_id	A. thaliana	ZTL	Galactose oxidase/kelch repeat superfamily protein
TRINITY_DN25587_c4_g2	AT4G00720	828023	ensembl_gene_id	A. thaliana	SK32	shaggy-like protein kinase 32
TRINITY_DN25587_c4_g2	AT5G14640	831316	ensembl_gene_id	A. thaliana	SK13	shaggy-like kinase 13
TRINITY_DN25587_c4_g2	AT3G61160	825288	ensembl_gene_id	A. thaliana	AT3G61160	Protein kinase superfamily protein
TRINITY_DN25587_c4_g2	AT3G05840	819753	ensembl_gene_id	A. thaliana	ATSK12	Protein kinase superfamily protein
TRINITY_DN25684_c5_g3	AT2G20680	816596	ensembl_gene_id	A. thaliana	MAN2	Glycosyl hydrolase superfamily protein
TRINITY_DN25684_c5_g3	AT4G28320	828947	ensembl_gene_id	A. thaliana	MAN5	Glycosyl hydrolase superfamily protein
TRINITY_DN25684_c5_g3	AT5G01930	831699	ensembl_gene_id	A. thaliana	MAN6	Glycosyl hydrolase superfamily protein
TRINITY_DN25684_c5_g3	AT3G10900	820260	ensembl_gene_id	A. thaliana	AT3G10900	Glycosyl hydrolase superfamily protein
TRINITY_DN25684_c5_g3	AT3G10890	820259	ensembl_gene_id	A. thaliana	AT3G10890	Glycosyl hydrolase superfamily protein
TRINITY_DN25685_c3_g2	AT2G23970	816930	ensembl_gene_id	A. thaliana	AT2G23970	Class I glutamine amidotransferase-like superfamily protein
TRINITY_DN25685_c3_g2	AT4G30550	829178	ensembl_gene_id	A. thaliana	GGP3	Class I glutamine amidotransferase-like superfamily protein
TRINITY_DN25685_c3_g2	AT4G30540	829177	ensembl_gene_id	A. thaliana	AT4G30540	Class I glutamine amidotransferase-like superfamily protein
TRINITY_DN25685_c3_g2	AT4G30530	829176	ensembl_gene_id	A. thaliana	GGP1	Class I glutamine amidotransferase-like superfamily protein
TRINITY_DN25685_c3_g2	AT2G23960	816929	ensembl_gene_id	A. thaliana	AT2G23960	Class I glutamine amidotransferase-like superfamily protein
TRINITY_DN25689_c8_g1	AT1G69420	843274	ensembl_gene_id	A. thaliana	AT1G69420	DHHC-type zinc finger family protein
TRINITY_DN25689_c8_g1	AT4G15080	827172	ensembl_gene_id	A. thaliana	AT4G15080	DHHC-type zinc finger family protein
TRINITY_DN25689_c8_g1	AT3G22180	821782	ensembl_gene_id	A. thaliana	AT3G22180	DHHC-type zinc finger family protein
TRINITY_DN25699_c3_g1	AT5G65250	836650	ensembl_gene_id	A. thaliana	AT5G65250	transmembrane protein
TRINITY_DN25699_c3_g1	AT1G65010	842809	ensembl_gene_id	A. thaliana	AT1G65010	WEB family protein (DUF827)
TRINITY_DN25699_c3_g1	AT1G12520	837808	ensembl_gene_id	A. thaliana	CCS	copper chaperone for SOD1
TRINITY_DN25699_c3_g1	AT2G31070	817659	ensembl_gene_id	A. thaliana	TCP10	TCP domain protein 10
TRINITY_DN25721_c0_g1	AT5G54850	835575	ensembl_gene_id	A. thaliana	AT5G54850	hexon
TRINITY_DN25721_c0_g1	AT2G34360	817999	ensembl_gene_id	A. thaliana	AT2G34360	MATE efflux family protein
TRINITY_DN25721_c0_g1	AT5G17040	831567	ensembl_gene_id	A. thaliana	AT5G17040	UDP-Glycosyltransferase superfamily protein
TRINITY_DN25721_c0_g1	AT5G52450	835321	ensembl_gene_id	A. thaliana	AT5G52450	MATE efflux family protein
TRINITY_DN25851_c1_g6	AT5G16000	831457	ensembl_gene_id	A. thaliana	NIK1	NSP-interacting kinase 1
TRINITY_DN25851_c1_g6	AT3G25560	822143	ensembl_gene_id	A. thaliana	NIK2	NSP-interacting kinase 2
TRINITY_DN25851_c1_g6	AT2G23950	816928	ensembl_gene_id	A. thaliana	AT2G23950	Leucine-rich repeat protein kinase family protein
TRINITY_DN25855_c7_g1	AT3G05850	3768859	ensembl_gene_id	A. thaliana	MUG7	MuDR family transposase
TRINITY_DN25855_c7_g1	AT1G06740	3766669	ensembl_gene_id	A. thaliana	MUG3	MuDR family transposase
TRINITY_DN25855_c7_g1	AT1G64260	842731	ensembl_gene_id	A. thaliana	AT1G64260	MuDR family transposase
TRINITY_DN25855_c7_g1	AT1G64253	28717394	ensembl_gene_id	A. thaliana	AT1G64253	DEK carboxy-terminal domain protein
TRINITY_DN25916_c0_g3	AT1G79870	844326	ensembl_gene_id	A. thaliana	AT1G79870	D-isomer specific 2-hydroxyacid dehydrogenase family protein
TRINITY_DN25916_c0_g3	AT1G12550	837811	ensembl_gene_id	A. thaliana	HPR3	D-isomer specific 2-hydroxyacid dehydrogenase family protein
TRINITY_DN25916_c0_g3	AT2G45630	819171	ensembl_gene_id	A. thaliana	AT2G45630	D-isomer specific 2-hydroxyacid dehydrogenase family protein
TRINITY_DN25916_c0_g3	AT4G34200	829568	ensembl_gene_id	A. thaliana	EDA9	D-3-phosphoglycerate dehydrogenase
TRINITY_DN26024_c2_g1	AT2G22540	816787	ensembl_gene_id	A. thaliana	SVP	K-box region and MADS-box transcription factor family protein
TRINITY_DN26024_c2_g1	AT4G24540	828556	ensembl_gene_id	A. thaliana	AGL24	AGAMOUS-like 24
TRINITY_DN26024_c2_g1	AT4G22950	828394	ensembl_gene_id	A. thaliana	AGL19	AGAMOUS-like 19
TRINITY_DN26027_c1_g3	AT1G08620	837384	ensembl_gene_id	A. thaliana	PKDM7D	Transcription factor jumonji (jmj) family protein / zinc finger (C5HC2 type) family protein
TRINITY_DN26027_c1_g3	AT2G34880	818053	ensembl_gene_id	A. thaliana	MEE27	Transcription factor jumonji (jmj) family protein / zinc finger (C5HC2 type) family protein
TRINITY_DN26053_c3_g2	AT1G64720	842780	ensembl_gene_id	A. thaliana	CP5	Polyketide cyclase/dehydrase and lipid transport superfamily protein
TRINITY_DN26053_c3_g2	AT5G54170	835505	ensembl_gene_id	A. thaliana	AT5G54170	Polyketide cyclase/dehydrase and lipid transport superfamily protein
TRINITY_DN26053_c3_g2	AT4G14500	827097	ensembl_gene_id	A. thaliana	AT4G14500	Polyketide cyclase/dehydrase and lipid transport superfamily protein
TRINITY_DN26053_c3_g2	AT3G23080	821882	ensembl_gene_id	A. thaliana	AT3G23080	Polyketide cyclase/dehydrase and lipid transport superfamily protein
TRINITY_DN26086_c3_g1	AT5G04140	830292	ensembl_gene_id	A. thaliana	GLU1	glutamate synthase 1
TRINITY_DN26086_c3_g1	AT2G41220	818721	ensembl_gene_id	A. thaliana	GLU2	glutamate synthase 2
TRINITY_DN26086_c3_g1	AT5G53460	835427	ensembl_gene_id	A. thaliana	GLT1	NADH-dependent glutamate synthase 1
TRINITY_DN26097_c3_g1	AT4G14540	827101	ensembl_gene_id	A. thaliana	NF-YB3	nuclear factor Y, subunit B3
TRINITY_DN26097_c3_g1	AT5G47640	834815	ensembl_gene_id	A. thaliana	NF-YB2	nuclear factor Y, subunit B2
TRINITY_DN26097_c3_g1	AT2G37060	818282	ensembl_gene_id	A. thaliana	NF-YB8	nuclear factor Y, subunit B8
TRINITY_DN26117_c0_g1	AT4G32250	829358	ensembl_gene_id	A. thaliana	AT4G32250	Protein kinase superfamily protein
TRINITY_DN26117_c0_g1	AT5G13530	831197	ensembl_gene_id	A. thaliana	KEG	protein kinases;ubiquitin-protein ligase
TRINITY_DN26147_c1_g1	AT5G53150	835396	ensembl_gene_id	A. thaliana	AT5G53150	DnaJ heat shock amino-terminal domain protein
TRINITY_DN26199_c0_g1	AT4G32300	829365	ensembl_gene_id	A. thaliana	SD2-5	S-domain-2 5
TRINITY_DN26199_c0_g1	AT5G35370	833498	ensembl_gene_id	A. thaliana	AT5G35370	S-locus lectin protein kinase family protein
TRINITY_DN26199_c0_g1	AT5G24080	832473	ensembl_gene_id	A. thaliana	AT5G24080	Protein kinase superfamily protein
TRINITY_DN26199_c0_g1	AT1G34300	840330	ensembl_gene_id	A. thaliana	AT1G34300	lectin protein kinase family protein
TRINITY_DN26217_c5_g1	AT4G20910	827839	ensembl_gene_id	A. thaliana	HEN1	double-stranded RNA binding protein-related / DsRBD protein-like protein
TRINITY_DN26217_c5_g1	AT4G20920	827840	ensembl_gene_id	A. thaliana	AT4G20920	double-stranded RNA-binding domain (DsRBD)-containing protein
TRINITY_DN26225_c4_g1	AT4G24150	828515	ensembl_gene_id	A. thaliana	GRF8	growth-regulating factor 8
TRINITY_DN26225_c4_g1	AT4G15050	827166	ensembl_gene_id	A. thaliana	AT4G15050	NEP-interacting protein, putative (DUF239)
TRINITY_DN26225_c4_g1	AT1G63500	842656	ensembl_gene_id	A. thaliana	BSK7	kinase with tetratricopeptide repeat domain-containing protein
TRINITY_DN26291_c2_g1	AT2G27920	817336	ensembl_gene_id	A. thaliana	SCPL51	serine carboxypeptidase-like 51
TRINITY_DN26291_c2_g1	AT3G45010	823636	ensembl_gene_id	A. thaliana	scpl48	serine carboxypeptidase-like 48
TRINITY_DN26291_c2_g1	AT1G15000	838065	ensembl_gene_id	A. thaliana	scpl50	serine carboxypeptidase-like 50
TRINITY_DN26295_c2_g1	AT5G08520	830751	ensembl_gene_id	A. thaliana	AT5G08520	Duplicated homeodomain-like superfamily protein
TRINITY_DN26295_c2_g1	AT1G49010	841324	ensembl_gene_id	A. thaliana	AT1G49010	Duplicated homeodomain-like superfamily protein
TRINITY_DN26295_c2_g1	AT2G38090	818387	ensembl_gene_id	A. thaliana	AT2G38090	Duplicated homeodomain-like superfamily protein
TRINITY_DN26295_c2_g1	AT5G58900	836007	ensembl_gene_id	A. thaliana	AT5G58900	Homeodomain-like transcriptional regulator
TRINITY_DN26295_c2_g1	AT5G04760	830354	ensembl_gene_id	A. thaliana	AT5G04760	Duplicated homeodomain-like superfamily protein
TRINITY_DN26320_c0_g3	AT2G07680	815414	ensembl_gene_id	A. thaliana	ABCC13	multidrug resistance-associated protein 11
TRINITY_DN26385_c1_g1	AT3G21430	821697	ensembl_gene_id	A. thaliana	ALY3	DNA binding protein
TRINITY_DN26385_c1_g1	AT3G05380	819702	ensembl_gene_id	A. thaliana	ALY2	ALWAYS EARLY 2
TRINITY_DN26423_c1_g1	AT1G80770	844416	ensembl_gene_id	A. thaliana	PDE318	P-loop containing nucleoside triphosphate hydrolases superfamily protein
TRINITY_DN26433_c8_g1	AT1G64625	844441	ensembl_gene_id	A. thaliana	AT1G64625	Serine/threonine-protein kinase WNK (With No Lysine)-like protein
TRINITY_DN26433_c8_g1	AT2G27230	817265	ensembl_gene_id	A. thaliana	LHW	transcription factor-like protein
TRINITY_DN26448_c1_g1	AT1G05960	837106	ensembl_gene_id	A. thaliana	AT1G05960	ARM repeat superfamily protein
TRINITY_DN26448_c1_g1	AT2G41830	818782	ensembl_gene_id	A. thaliana	AT2G41830	hypothetical protein
TRINITY_DN26491_c1_g2	AT1G51610	841586	ensembl_gene_id	A. thaliana	AT1G51610	Cation efflux family protein
TRINITY_DN26491_c1_g2	AT2G47830	819395	ensembl_gene_id	A. thaliana	AT2G47830	Cation efflux family protein
TRINITY_DN26491_c1_g2	AT5G65040	836628	ensembl_gene_id	A. thaliana	AT5G65040	senescence-associated family protein (DUF581)
TRINITY_DN26491_c1_g2	AT3G62910	825466	ensembl_gene_id	A. thaliana	APG3	Peptide chain release factor 1
TRINITY_DN26491_c1_g2	AT1G10510	837591	ensembl_gene_id	A. thaliana	emb2004	RNI-like superfamily protein
TRINITY_DN26501_c0_g2	AT1G27430	839633	ensembl_gene_id	A. thaliana	AT1G27430	GYF domain-containing protein
TRINITY_DN26501_c0_g2	AT1G24300	839046	ensembl_gene_id	A. thaliana	AT1G24300	GYF domain-containing protein
TRINITY_DN26504_c2_g1	AT5G35695	833543	ensembl_gene_id	A. thaliana	AT5G35695	nuclease HARBI1-like protein
TRINITY_DN26504_c2_g1	AT5G41980	834203	ensembl_gene_id	A. thaliana	AT5G41980	nuclease
TRINITY_DN26504_c2_g1	AT2G13770	815861	ensembl_gene_id	A. thaliana	AT2G13770	nuclease
TRINITY_DN26504_c2_g1	AT3G19120	821446	ensembl_gene_id	A. thaliana	AT3G19120	PIF / Ping-Pong family of plant transposase
TRINITY_DN26504_c2_g1	AT3G55350	824701	ensembl_gene_id	A. thaliana	AT3G55350	PIF / Ping-Pong family of plant transposase
TRINITY_DN26515_c0_g1	AT5G12430	831118	ensembl_gene_id	A. thaliana	TPR16	Heat shock protein DnaJ with tetratricopeptide repeat-containing protein
TRINITY_DN26515_c0_g1	AT2G41520	818750	ensembl_gene_id	A. thaliana	TPR15	Heat shock protein DnaJ with tetratricopeptide repeat-containing protein
TRINITY_DN26515_c0_g1	AT3G58620	825031	ensembl_gene_id	A. thaliana	TTL4	tetratricopetide-repeat thioredoxin-like 4
TRINITY_DN26538_c0_g1	AT2G15220	816011	ensembl_gene_id	A. thaliana	AT2G15220	Plant basic secretory protein (BSP) family protein
TRINITY_DN26538_c0_g1	AT2G15130	816001	ensembl_gene_id	A. thaliana	AT2G15130	Plant basic secretory protein (BSP) family protein
TRINITY_DN26538_c0_g1	AT2G42900	818891	ensembl_gene_id	A. thaliana	AT2G42900	Plant basic secretory protein (BSP) family protein
TRINITY_DN26538_c0_g1	AT1G29660	839843	ensembl_gene_id	A. thaliana	AT1G29660	GDSL-like Lipase/Acylhydrolase superfamily protein
TRINITY_DN26591_c9_g2	AT4G22670	828363	ensembl_gene_id	A. thaliana	HIP1	HSP70-interacting protein 1
TRINITY_DN26591_c9_g2	AT3G17880	821056	ensembl_gene_id	A. thaliana	TDX	tetraticopeptide domain-containing thioredoxin
TRINITY_DN26591_c9_g2	AT4G12400	826849	ensembl_gene_id	A. thaliana	Hop3	stress-inducible protein
TRINITY_DN26675_c1_g2	AT4G27290	828837	ensembl_gene_id	A. thaliana	AT4G27290	S-locus lectin protein kinase family protein
TRINITY_DN26675_c1_g2	AT4G21380	827890	ensembl_gene_id	A. thaliana	RK3	receptor kinase 3
TRINITY_DN26675_c1_g2	AT4G27300	828838	ensembl_gene_id	A. thaliana	AT4G27300	S-locus lectin protein kinase family protein
TRINITY_DN26675_c1_g2	AT1G11300	837672	ensembl_gene_id	A. thaliana	AT1G11300	G-type lectin S-receptor-like Serine/Threonine-kinase
TRINITY_DN26675_c1_g2	AT1G65790	842890	ensembl_gene_id	A. thaliana	RK1	receptor kinase 1
TRINITY_DN26703_c1_g1	AT4G18160	827541	ensembl_gene_id	A. thaliana	KCO6	Ca2+ activated outward rectifying K+ channel 6
TRINITY_DN26703_c1_g1	AT5G46370	834680	ensembl_gene_id	A. thaliana	KCO2	Ca2+ activated outward rectifying K+ channel 2
TRINITY_DN26703_c1_g1	AT4G01840	828091	ensembl_gene_id	A. thaliana	KCO5	Ca2+ activated outward rectifying K+ channel 5
TRINITY_DN26703_c1_g1	AT1G02510	837846	ensembl_gene_id	A. thaliana	TPK4	Outward rectifying potassium channel protein
TRINITY_DN26703_c1_g1	AT5G55630	835657	ensembl_gene_id	A. thaliana	KCO1	Outward rectifying potassium channel protein
TRINITY_DN26735_c1_g1	AT1G80010	844341	ensembl_gene_id	A. thaliana	FRS8	FAR1-related sequence 8
TRINITY_DN26735_c1_g1	AT4G38180	829974	ensembl_gene_id	A. thaliana	FRS5	FAR1-related sequence 5
TRINITY_DN26735_c1_g1	AT1G52520	841683	ensembl_gene_id	A. thaliana	FRS6	FAR1-related sequence 6
TRINITY_DN26735_c1_g1	AT2G32250	817785	ensembl_gene_id	A. thaliana	FRS2	FAR1-related sequence 2
TRINITY_DN26821_c1_g1	AT5G56780	835780	ensembl_gene_id	A. thaliana	ET2	effector of transcription2
TRINITY_DN26821_c1_g1	AT1G01790	837332	ensembl_gene_id	A. thaliana	KEA1	K+ efflux antiporter 1
TRINITY_DN26838_c0_g1	AT1G61260	842420	ensembl_gene_id	A. thaliana	AT1G61260	cotton fiber (DUF761)
TRINITY_DN26838_c0_g1	AT5G54300	835518	ensembl_gene_id	A. thaliana	AT5G54300	cotton fiber-like protein (DUF761)
TRINITY_DN26838_c0_g1	AT1G11220	837663	ensembl_gene_id	A. thaliana	AT1G11220	cotton fiber, putative (DUF761)
TRINITY_DN26838_c0_g1	AT1G11230	837664	ensembl_gene_id	A. thaliana	AT1G11230	transmembrane protein, putative (DUF761)
TRINITY_DN26872_c3_g2	AT1G07390	837251	ensembl_gene_id	A. thaliana	RLP1	receptor like protein 1
TRINITY_DN26872_c3_g2	AT1G58190	842186	ensembl_gene_id	A. thaliana	RLP9	receptor like protein 9
TRINITY_DN26890_c4_g1	AT4G16444	827341	ensembl_gene_id	A. thaliana	AT4G16444	tail-anchored protein insertion receptor WRB-like protein
TRINITY_DN26890_c4_g1	AT4G23820	828482	ensembl_gene_id	A. thaliana	AT4G23820	Pectin lyase-like superfamily protein
TRINITY_DN26890_c4_g1	AT2G18210	816336	ensembl_gene_id	A. thaliana	AT2G18210	hypothetical protein
TRINITY_DN26890_c4_g1	AT4G28790	829000	ensembl_gene_id	A. thaliana	AT4G28790	basic helix-loop-helix (bHLH) DNA-binding superfamily protein
TRINITY_DN26988_c2_g5	AT3G07870	819978	ensembl_gene_id	A. thaliana	AT3G07870	F-box and associated interaction domains-containing protein
TRINITY_DN26988_c2_g5	AT3G06240	819798	ensembl_gene_id	A. thaliana	AT3G06240	F-box family protein
TRINITY_DN26988_c2_g5	AT4G12560	826869	ensembl_gene_id	A. thaliana	CPR1	F-box and associated interaction domains-containing protein
TRINITY_DN27055_c6_g2	AT5G38000	833779	ensembl_gene_id	A. thaliana	AT5G38000	Zinc-binding dehydrogenase family protein
TRINITY_DN27063_c3_g2	AT2G06105	28717693	ensembl_gene_id	A. thaliana	AT2G06105	aspartyl protease gag-polyprotein
TRINITY_DN27063_c3_g2	AT3G13235	820522	ensembl_gene_id	A. thaliana	DDI1	ubiquitin family protein
TRINITY_DN27080_c3_g4	AT3G24255	822013	ensembl_gene_id	A. thaliana	AT3G24255	RNA-directed DNA polymerase (reverse transcriptase)-related family protein
TRINITY_DN27102_c1_g2	AT1G43760	840968	ensembl_gene_id	A. thaliana	AT1G43760	DNAse I-like superfamily protein
TRINITY_DN27102_c1_g2	AT1G05670	837074	ensembl_gene_id	A. thaliana	AT1G05670	Pentatricopeptide repeat (PPR-like) superfamily protein
TRINITY_DN27246_c5_g1	AT4G38040	829960	ensembl_gene_id	A. thaliana	AT4G38040	Exostosin family protein
TRINITY_DN27246_c5_g1	AT4G16745	827378	ensembl_gene_id	A. thaliana	AT4G16745	Exostosin family protein
TRINITY_DN27246_c5_g1	AT5G11610	831033	ensembl_gene_id	A. thaliana	AT5G11610	Exostosin family protein
TRINITY_DN27246_c5_g1	AT5G03795	3770626	ensembl_gene_id	A. thaliana	AT5G03795	Exostosin family protein
TRINITY_DN27246_c6_g1	AT1G30360	839916	ensembl_gene_id	A. thaliana	ERD4	Early-responsive to dehydration stress protein (ERD4)
TRINITY_DN27246_c6_g1	AT4G02900	828143	ensembl_gene_id	A. thaliana	AT4G02900	ERD (early-responsive to dehydration stress) family protein
TRINITY_DN27246_c6_g1	AT1G11960	837748	ensembl_gene_id	A. thaliana	AT1G11960	ERD (early-responsive to dehydration stress) family protein
TRINITY_DN27246_c9_g1	AT2G02480	814777	ensembl_gene_id	A. thaliana	STI	AAA-type ATPase family protein
TRINITY_DN27246_c9_g1	AT1G14460	838008	ensembl_gene_id	A. thaliana	AT1G14460	AAA-type ATPase family protein
TRINITY_DN27246_c9_g1	AT4G24790	828581	ensembl_gene_id	A. thaliana	AT4G24790	AAA-type ATPase family protein
TRINITY_DN27276_c2_g7	AT5G49910	835054	ensembl_gene_id	A. thaliana	cpHsc70-2	chloroplast heat shock protein 70-2
TRINITY_DN27276_c2_g7	AT4G24280	828531	ensembl_gene_id	A. thaliana	cpHsc70-1	chloroplast heat shock protein 70-1
TRINITY_DN27276_c2_g7	AT5G09590	830818	ensembl_gene_id	A. thaliana	MTHSC70-2	mitochondrial HSO70 2
TRINITY_DN27276_c2_g7	AT4G37910	829947	ensembl_gene_id	A. thaliana	mtHsc70-1	mitochondrial heat shock protein 70-1
TRINITY_DN27368_c2_g2	AT1G22850	838890	ensembl_gene_id	A. thaliana	AT1G22850	SNARE associated Golgi protein family
TRINITY_DN27368_c2_g2	AT1G03260	839546	ensembl_gene_id	A. thaliana	AT1G03260	SNARE associated Golgi protein family
TRINITY_DN27368_c2_g2	AT5G19070	832026	ensembl_gene_id	A. thaliana	AT5G19070	SNARE associated Golgi protein family
TRINITY_DN27371_c0_g1	AT3G42170	3769417	ensembl_gene_id	A. thaliana	DAYSLEEPER	BED zinc finger and hAT dimerization domain-containing protein DAYSLEEPER
TRINITY_DN27371_c0_g1	AT1G18560	838437	ensembl_gene_id	A. thaliana	AT1G18560	BED zinc finger and hAT dimerization domain-containing protein
TRINITY_DN27371_c0_g2	AT5G58370	835949	ensembl_gene_id	A. thaliana	AT5G58370	P-loop containing nucleoside triphosphate hydrolases superfamily protein
TRINITY_DN27371_c0_g2	AT5G11480	831019	ensembl_gene_id	A. thaliana	AT5G11480	P-loop containing nucleoside triphosphate hydrolases superfamily protein
TRINITY_DN27371_c0_g2	AT2G22870	816818	ensembl_gene_id	A. thaliana	EMB2001	P-loop containing nucleoside triphosphate hydrolases superfamily protein
TRINITY_DN27403_c0_g1	AT1G17980	838378	ensembl_gene_id	A. thaliana	PAPS1	poly(A) polymerase 1
TRINITY_DN27403_c0_g1	AT2G25850	817127	ensembl_gene_id	A. thaliana	PAPS2	poly(A) polymerase 2
TRINITY_DN27416_c1_g5	AT4G03410	827932	ensembl_gene_id	A. thaliana	AT4G03410	Peroxisomal membrane 22 kDa (Mpv17/PMP22) family protein
TRINITY_DN27416_c1_g5	AT1G52870	841720	ensembl_gene_id	A. thaliana	AT1G52870	Peroxisomal membrane 22 kDa (Mpv17/PMP22) family protein
TRINITY_DN27416_c1_g5	AT1G51070	841529	ensembl_gene_id	A. thaliana	bHLH115	basic helix-loop-helix (bHLH) DNA-binding superfamily protein
TRINITY_DN27470_c4_g2	AT5G51820	835257	ensembl_gene_id	A. thaliana	PGM	phosphoglucomutase
TRINITY_DN27470_c4_g2	AT1G23190	838927	ensembl_gene_id	A. thaliana	PGM3	Phosphoglucomutase/phosphomannomutase family protein
TRINITY_DN27470_c4_g2	AT1G70730	843410	ensembl_gene_id	A. thaliana	PGM2	Phosphoglucomutase/phosphomannomutase family protein
TRINITY_DN27471_c1_g1	AT1G28260	839720	ensembl_gene_id	A. thaliana	AT1G28260	Telomerase activating protein Est1
TRINITY_DN27471_c1_g1	AT5G19400	832060	ensembl_gene_id	A. thaliana	SMG7	Telomerase activating protein Est1
TRINITY_DN27511_c1_g2	AT4G09650	826551	ensembl_gene_id	A. thaliana	ATPD	F-type H+-transporting ATPase subunit delta
TRINITY_DN27511_c1_g2	AT5G13450	831186	ensembl_gene_id	A. thaliana	ATP5	delta subunit of Mt ATP synthase
TRINITY_DN27511_c1_g2	AT3G33530	823149	ensembl_gene_id	A. thaliana	AT3G33530	Transducin family protein / WD-40 repeat family protein
TRINITY_DN27560_c0_g1	AT1G06620	837171	ensembl_gene_id	A. thaliana	AT1G06620	2-oxoglutarate (2OG) and Fe(II)-dependent oxygenase superfamily protein
TRINITY_DN27560_c0_g1	AT1G03410	838763	ensembl_gene_id	A. thaliana	2A6	2-oxoglutarate (2OG) and Fe(II)-dependent oxygenase superfamily protein
TRINITY_DN27560_c0_g1	AT1G06650	837175	ensembl_gene_id	A. thaliana	AT1G06650	2-oxoglutarate (2OG) and Fe(II)-dependent oxygenase superfamily protein
TRINITY_DN27574_c2_g2	AT5G15700	831424	ensembl_gene_id	A. thaliana	AT5G15700	DNA/RNA polymerases superfamily protein
TRINITY_DN27574_c2_g2	AT1G68990	843232	ensembl_gene_id	A. thaliana	MGP3	male gametophyte defective 3
TRINITY_DN27574_c2_g2	AT2G24120	816946	ensembl_gene_id	A. thaliana	SCA3	DNA/RNA polymerases superfamily protein
TRINITY_DN27609_c0_g1	AT3G16520	820900	ensembl_gene_id	A. thaliana	UGT88A1	UDP-glucosyl transferase 88A1
TRINITY_DN27609_c0_g1	AT4G01070	827912	ensembl_gene_id	A. thaliana	GT72B1	UDP-Glycosyltransferase superfamily protein
TRINITY_DN27609_c0_g1	AT4G36770	829830	ensembl_gene_id	A. thaliana	AT4G36770	UDP-Glycosyltransferase superfamily protein
TRINITY_DN27610_c2_g3	AT3G55360	824702	ensembl_gene_id	A. thaliana	CER10	3-oxo-5-alpha-steroid 4-dehydrogenase family protein
TRINITY_DN27610_c2_g3	AT5G16010	831458	ensembl_gene_id	A. thaliana	AT5G16010	3-oxo-5-alpha-steroid 4-dehydrogenase family protein
TRINITY_DN27610_c2_g3	AT2G38050	818383	ensembl_gene_id	A. thaliana	DET2	3-oxo-5-alpha-steroid 4-dehydrogenase family protein
TRINITY_DN27610_c2_g3	AT1G72590	843591	ensembl_gene_id	A. thaliana	AT1G72590	3-oxo-5-alpha-steroid 4-dehydrogenase family protein
TRINITY_DN27610_c2_g3	AT2G25790	817121	ensembl_gene_id	A. thaliana	AT2G25790	Leucine-rich receptor-like protein kinase family protein
TRINITY_DN27620_c2_g2	AT1G55930	842044	ensembl_gene_id	A. thaliana	AT1G55930	CBS domain-containing protein / transporter associated domain-containing protein
TRINITY_DN27620_c2_g2	AT3G13070	820495	ensembl_gene_id	A. thaliana	AT3G13070	CBS domain-containing protein / transporter associated domain-containing protein
TRINITY_DN27620_c2_g2	AT2G14520	815939	ensembl_gene_id	A. thaliana	AT2G14520	CBS domain protein (DUF21)
TRINITY_DN27700_c1_g1	AT2G03810	814907	ensembl_gene_id	A. thaliana	AT2G03810	18S pre-ribosomal assembly protein gar2-like protein
TRINITY_DN27720_c2_g2	AT4G37850	829941	ensembl_gene_id	A. thaliana	AT4G37850	basic helix-loop-helix (bHLH) DNA-binding superfamily protein
TRINITY_DN27720_c2_g2	AT2G22750	816805	ensembl_gene_id	A. thaliana	AT2G22750	basic helix-loop-helix (bHLH) DNA-binding superfamily protein
TRINITY_DN27721_c2_g1	AT2G20710	816599	ensembl_gene_id	A. thaliana	AT2G20710	Tetratricopeptide repeat (TPR)-like superfamily protein
TRINITY_DN27721_c2_g1	AT1G02150	839577	ensembl_gene_id	A. thaliana	AT1G02150	Tetratricopeptide repeat (TPR)-like superfamily protein
TRINITY_DN27721_c2_g1	AT4G21705	828258	ensembl_gene_id	A. thaliana	AT4G21705	Tetratricopeptide repeat (TPR)-like superfamily protein
TRINITY_DN27721_c2_g1	AT5G27460	832805	ensembl_gene_id	A. thaliana	AT5G27460	Tetratricopeptide repeat (TPR)-like superfamily protein
TRINITY_DN27762_c4_g2	AT1G13570	837918	ensembl_gene_id	A. thaliana	AT1G13570	F-box/RNI-like superfamily protein
TRINITY_DN27762_c4_g2	AT1G69550	843291	ensembl_gene_id	A. thaliana	AT1G69550	disease resistance protein (TIR-NBS-LRR class)
TRINITY_DN27762_c4_g2	AT5G66900	836824	ensembl_gene_id	A. thaliana	AT5G66900	Disease resistance protein (CC-NBS-LRR class) family
TRINITY_DN27788_c1_g4	AT1G67120	843032	ensembl_gene_id	A. thaliana	AT1G67120	midasin-like protein
TRINITY_DN27788_c1_g4	AT5G51070	835180	ensembl_gene_id	A. thaliana	ERD1	Clp ATPase
TRINITY_DN27788_c1_g4	AT2G25140	817052	ensembl_gene_id	A. thaliana	CLPB4	casein lytic proteinase B4
TRINITY_DN27788_c1_g4	AT5G47040	834750	ensembl_gene_id	A. thaliana	LON2	lon protease 2
TRINITY_DN27850_c2_g1	AT1G23220	838931	ensembl_gene_id	A. thaliana	AT1G23220	Dynein light chain type 1 family protein
TRINITY_DN27850_c2_g1	AT5G20110	832133	ensembl_gene_id	A. thaliana	AT5G20110	Dynein light chain type 1 family protein
TRINITY_DN27850_c2_g1	AT4G27360	828844	ensembl_gene_id	A. thaliana	AT4G27360	Dynein light chain type 1 family protein
TRINITY_DN27850_c2_g1	AT4G15930	827275	ensembl_gene_id	A. thaliana	AT4G15930	Dynein light chain type 1 family protein
TRINITY_DN27850_c2_g1	AT3G16120	820857	ensembl_gene_id	A. thaliana	AT3G16120	Dynein light chain type 1 family protein
TRINITY_DN27890_c4_g3	AT4G15090	827173	ensembl_gene_id	A. thaliana	FAR1	FRS (FAR1 Related Sequences) transcription factor family
TRINITY_DN27911_c3_g1	AT1G31150	840000	ensembl_gene_id	A. thaliana	AT1G31150	K-box region protein (DUF1985)
TRINITY_DN27911_c3_g1	AT4G25700	828675	ensembl_gene_id	A. thaliana	BETA-OHASE 1	beta-hydroxylase 1
TRINITY_DN27911_c3_g1	AT3G05450	819710	ensembl_gene_id	A. thaliana	AT3G05450	cystatin-like protein
TRINITY_DN27911_c3_g1	AT3G58160	824985	ensembl_gene_id	A. thaliana	XIJ	P-loop containing nucleoside triphosphate hydrolases superfamily protein
TRINITY_DN28046_c0_g3	AT2G05370	815085	ensembl_gene_id	A. thaliana	AT2G05370	RNA-dependent RNA polymerase-like protein
TRINITY_DN28046_c0_g3	AT3G11390	820311	ensembl_gene_id	A. thaliana	AT3G11390	Cysteine/Histidine-rich C1 domain family protein
TRINITY_DN28057_c1_g1	AT4G33620	829502	ensembl_gene_id	A. thaliana	AT4G33620	Cysteine proteinases superfamily protein
TRINITY_DN28092_c5_g3	AT5G05510	830434	ensembl_gene_id	A. thaliana	AT5G05510	Mad3/BUB1 homology region 1
TRINITY_DN28092_c5_g3	AT2G33560	817921	ensembl_gene_id	A. thaliana	BUBR1	BUB1-related (BUB1: budding uninhibited by benzymidazol 1)
TRINITY_DN28092_c5_g3	AT2G20635	816591	ensembl_gene_id	A. thaliana	AT2G20635	protein kinase and Mad3-BUB1-I domain-containing protein
TRINITY_DN28148_c7_g3	AT4G05475	10723048	ensembl_gene_id	A. thaliana	AT4G05475	RNI-like superfamily protein
TRINITY_DN28148_c7_g3	AT4G05460	825896	ensembl_gene_id	A. thaliana	AT4G05460	RNI-like superfamily protein
TRINITY_DN28148_c7_g3	AT4G05470	825897	ensembl_gene_id	A. thaliana	AT4G05470	RNI-like superfamily protein
TRINITY_DN28148_c7_g3	AT4G05497	830176	ensembl_gene_id	A. thaliana	AT4G05497	RNI-like superfamily protein
TRINITY_DN28148_c7_g3	AT4G05490	825898	ensembl_gene_id	A. thaliana	AT4G05490	RNI-like superfamily protein
TRINITY_DN28156_c0_g1	AT1G20640	838653	ensembl_gene_id	A. thaliana	AT1G20640	Plant regulator RWP-RK family protein
TRINITY_DN28156_c0_g1	AT1G76350	843967	ensembl_gene_id	A. thaliana	AT1G76350	Plant regulator RWP-RK family protein
TRINITY_DN28207_c11_g1	AT4G35930	829748	ensembl_gene_id	A. thaliana	FBS4	F-box family protein
TRINITY_DN28207_c11_g1	AT1G61340	842428	ensembl_gene_id	A. thaliana	FBS1	F-box family protein
TRINITY_DN28323_c5_g1	AT2G35940	818167	ensembl_gene_id	A. thaliana	BLH1	BEL1-like homeodomain 1
TRINITY_DN28323_c5_g1	AT4G34610	829613	ensembl_gene_id	A. thaliana	BLH6	BEL1-like homeodomain 6
TRINITY_DN28336_c7_g1	AT2G24710	817007	ensembl_gene_id	A. thaliana	GLR2.3	glutamate receptor 2.3
TRINITY_DN28336_c7_g1	AT2G24720	817008	ensembl_gene_id	A. thaliana	GLR2.2	glutamate receptor 2.2
TRINITY_DN28336_c7_g1	AT5G27100	832768	ensembl_gene_id	A. thaliana	GLR2.1	glutamate receptor 2.1
TRINITY_DN28358_c1_g1	AT3G01680	821097	ensembl_gene_id	A. thaliana	SEOR1	sieve element occlusion amino-terminus protein
TRINITY_DN28358_c1_g1	AT3G01670	821096	ensembl_gene_id	A. thaliana	SEOa	sieve element occlusion protein
TRINITY_DN28358_c1_g1	AT1G67790	843105	ensembl_gene_id	A. thaliana	AT1G67790	sieve element occlusion protein
TRINITY_DN28358_c1_g1	AT4G31240	829251	ensembl_gene_id	A. thaliana	AT4G31240	protein kinase C-like zinc finger protein
TRINITY_DN28471_c0_g2	AT5G28680	832975	ensembl_gene_id	A. thaliana	ANX2	Malectin/receptor-like protein kinase family protein
TRINITY_DN28471_c0_g2	AT4G29450	829066	ensembl_gene_id	A. thaliana	AT4G29450	Leucine-rich repeat protein kinase family protein
TRINITY_DN28471_c0_g2	AT5G38990	833891	ensembl_gene_id	A. thaliana	AT5G38990	Malectin/receptor-like protein kinase family protein
TRINITY_DN28471_c0_g2	AT3G51550	824318	ensembl_gene_id	A. thaliana	FER	Malectin/receptor-like protein kinase family protein
TRINITY_DN28492_c0_g1	AT4G17250	827439	ensembl_gene_id	A. thaliana	AT4G17250	transmembrane protein
TRINITY_DN28492_c0_g1	AT5G47580	834808	ensembl_gene_id	A. thaliana	ASG7	transmembrane protein
TRINITY_DN28492_c0_g1	AT1G02080	839244	ensembl_gene_id	A. thaliana	AT1G02080	transcription regulator
TRINITY_DN28762_c0_g1	AT1G57720	842147	ensembl_gene_id	A. thaliana	AT1G57720	Translation elongation factor EF1B, gamma chain
TRINITY_DN28762_c0_g1	AT1G09640	837491	ensembl_gene_id	A. thaliana	AT1G09640	Translation elongation factor EF1B, gamma chain
TRINITY_DN28762_c0_g1	AT5G26710	832718	ensembl_gene_id	A. thaliana	AT5G26710	Glutamyl/glutaminyl-tRNA synthetase, class Ic
TRINITY_DN28917_c0_g1	AT3G29160	822566	ensembl_gene_id	A. thaliana	KIN11	SNF1 kinase homolog 11
TRINITY_DN28917_c0_g1	AT3G01090	821259	ensembl_gene_id	A. thaliana	KIN10	SNF1 kinase homolog 10
TRINITY_DN31111_c0_g1	AT3G31430	822909	ensembl_gene_id	A. thaliana	AT3G31430	zinc knuckle (CCHC-type) family protein
TRINITY_DN31111_c0_g1	AT1G35030	840388	ensembl_gene_id	A. thaliana	AT1G35030	hypothetical protein
TRINITY_DN31111_c0_g1	AT1G34855	28717304	ensembl_gene_id	A. thaliana	AT1G34855	hypothetical protein
TRINITY_DN31111_c0_g1	AT1G34822	28717302	ensembl_gene_id	A. thaliana	AT1G34822	hypothetical protein
TRINITY_DN31111_c0_g1	AT1G34817	28717301	ensembl_gene_id	A. thaliana	AT1G34817	hypothetical protein
TRINITY_DN31417_c0_g1	AT3G09630	820120	ensembl_gene_id	A. thaliana	AT3G09630	Ribosomal protein L4/L1 family
TRINITY_DN31417_c0_g1	AT5G02870	831756	ensembl_gene_id	A. thaliana	AT5G02870	Ribosomal protein L4/L1 family
TRINITY_DN31417_c0_g1	AT1G74400	843781	ensembl_gene_id	A. thaliana	AT1G74400	Tetratricopeptide repeat (TPR)-like superfamily protein
TRINITY_DN36156_c0_g1	AT3G52480	824413	ensembl_gene_id	A. thaliana	AT3G52480	transmembrane protein
TRINITY_DN36156_c0_g1	AT3G11640	820336	ensembl_gene_id	A. thaliana	AT3G11640	transmembrane protein
TRINITY_DN36156_c0_g1	AT5G11020	830969	ensembl_gene_id	A. thaliana	AT5G11020	Protein kinase superfamily protein
TRINITY_DN37101_c0_g1	AT5G02960	831724	ensembl_gene_id	A. thaliana	AT5G02960	Ribosomal protein S12/S23 family protein
TRINITY_DN37101_c0_g1	AT3G09680	820125	ensembl_gene_id	A. thaliana	AT3G09680	Ribosomal protein S12/S23 family protein
TRINITY_DN37101_c0_g1	ATMG00980	815348	ensembl_gene_id	A. thaliana	AT2G07675	Ribosomal protein S12/S23 family protein
TRINITY_DN38740_c0_g1	AT2G13360	815822	ensembl_gene_id	A. thaliana	AGT	alanine:glyoxylate aminotransferase
TRINITY_DN38740_c0_g1	AT3G49250	824086	ensembl_gene_id	A. thaliana	DMS3	defective in meristem silencing 3
TRINITY_DN38740_c0_g1	AT5G26360	832705	ensembl_gene_id	A. thaliana	AT5G26360	TCP-1/cpn60 chaperonin family protein
TRINITY_DN39892_c0_g1	AT3G56970	824864	ensembl_gene_id	A. thaliana	bHLH38	basic helix-loop-helix (bHLH) DNA-binding superfamily protein
TRINITY_DN39892_c0_g1	AT3G56980	824865	ensembl_gene_id	A. thaliana	bHLH39	basic helix-loop-helix (bHLH) DNA-binding superfamily protein
TRINITY_DN39892_c0_g1	AT5G13170	831156	ensembl_gene_id	A. thaliana	SAG29	senescence-associated gene 29
TRINITY_DN39892_c0_g1	AT3G09250	820081	ensembl_gene_id	A. thaliana	AT3G09250	Nuclear transport factor 2 (NTF2) family protein
TRINITY_DN4070_c0_g1	AT2G30020	817553	ensembl_gene_id	A. thaliana	AT2G30020	Protein phosphatase 2C family protein
TRINITY_DN4070_c0_g1	AT1G07160	837227	ensembl_gene_id	A. thaliana	AT1G07160	Protein phosphatase 2C family protein
TRINITY_DN4070_c0_g1	AT2G40180	818609	ensembl_gene_id	A. thaliana	PP2C5	phosphatase 2C5
TRINITY_DN4070_c0_g1	AT4G08260	826376	ensembl_gene_id	A. thaliana	AT4G08260	Protein phosphatase 2C family protein
TRINITY_DN4070_c0_g1	AT1G67820	843108	ensembl_gene_id	A. thaliana	AT1G67820	Protein phosphatase 2C family protein
TRINITY_DN42027_c0_g1	AT3G11430	820316	ensembl_gene_id	A. thaliana	GPAT5	glycerol-3-phosphate acyltransferase 5
TRINITY_DN42027_c0_g1	AT5G06090	830496	ensembl_gene_id	A. thaliana	GPAT7	glycerol-3-phosphate acyltransferase 7
TRINITY_DN42027_c0_g1	AT3G11325	820305	ensembl_gene_id	A. thaliana	AT3G11325	Phospholipid/glycerol acyltransferase family protein
TRINITY_DN42027_c0_g1	AT2G38110	818389	ensembl_gene_id	A. thaliana	GPAT6	glycerol-3-phosphate acyltransferase 6
TRINITY_DN45796_c0_g1	AT1G74050	843744	ensembl_gene_id	A. thaliana	AT1G74050	Ribosomal protein L6 family protein
TRINITY_DN45796_c0_g1	AT1G74060	843746	ensembl_gene_id	A. thaliana	AT1G74060	Ribosomal protein L6 family protein
TRINITY_DN45796_c0_g1	AT1G18540	838435	ensembl_gene_id	A. thaliana	AT1G18540	Ribosomal protein L6 family protein
TRINITY_DN45796_c0_g1	AT2G32220	817781	ensembl_gene_id	A. thaliana	AT2G32220	Ribosomal L27e protein family
TRINITY_DN45796_c0_g1	AT2G19590	816478	ensembl_gene_id	A. thaliana	ACO1	ACC oxidase 1
TRINITY_DN6098_c0_g1	AT3G50670	824230	ensembl_gene_id	A. thaliana	U1-70K	U1 small nuclear ribonucleoprotein-70K
TRINITY_DN6098_c0_g1	AT2G43370	818938	ensembl_gene_id	A. thaliana	AT2G43370	RNA-binding (RRM/RBD/RNP motifs) family protein
TRINITY_DN6098_c0_g1	AT3G46020	823745	ensembl_gene_id	A. thaliana	AT3G46020	RNA-binding (RRM/RBD/RNP motifs) family protein

## Sheet: Table S4_GO_AllLists
Table S3 Summary of functional enrichment analysis of positively selected genes. Pathway terms with a p-value < 0.01, and an enrichment factor > 1.5 (the enrichment factor is the ratio between the observed counts and the counts expected by chance) were collected. -, not applicable.
Category	Pathway term	Description	Parent GO	P-value	Enrichment	Hit gene symbol
GO Biological Processes	GO:0000027	ribosomal large subunit assembly	GO:0071840 cellular component organization or biogenesis	0.00630957	5.4	AT1G18540|AT1G67120|AT1G74050|AT1G74060
GO Biological Processes	GO:0070601	centromeric sister chromatid cohesion	GO:0071840 cellular component organization or biogenesis	0.000630957	16	AT2G20635|BUBR1|AT5G05510
GO Biological Processes	GO:0001505	regulation of neurotransmitter levels	GO:0065007 biological regulation	0.00398107	4.6	AGT|GLU2|GLU1|GLT1|CML23
GO Biological Processes	GO:0006874	cellular calcium ion homeostasis	GO:0065007 biological regulation	0.00251189	4.4	GLR2|GLR2.3|GLR2.2|ECA2|GLUR2|GLR2.1
GO Biological Processes	GO:0006875	cellular metal ion homeostasis	GO:0065007 biological regulation	0.00251189	2.9	GLR2|GLR2.3|GLR2.2|bHLH38|bHLH39|ECA2|GLUR2|GLR2.1|KCO1|CCS
GO Biological Processes	GO:0030003	cellular cation homeostasis	GO:0065007 biological regulation	0.00794328	2.4	GLR2|GLR2.3|GLR2.2|bHLH38|bHLH39|ECA2|GLUR2|GLR2.1|KCO1|CCS
GO Biological Processes	GO:0030322	stabilization of membrane potential	GO:0065007 biological regulation	1.25893e-08	38	KCO6|KCO5|KCO2|KCO1|TPK4
GO Biological Processes	GO:0032781	positive regulation of ATPase activity	GO:0065007 biological regulation	2.51189e-07	27	AT3G16120|AT4G15930|AT4G27360|AT5G20110|AT1G23220
GO Biological Processes	GO:0042133	neurotransmitter metabolic process	GO:0065007 biological regulation	0.00251189	5.1	AGT|GLU2|GLU1|GLT1|CML23
GO Biological Processes	GO:0042391	regulation of membrane potential	GO:0065007 biological regulation	7.94328e-08	31	KCO6|KCO5|KCO2|KCO1|TPK4
GO Biological Processes	GO:0043462	regulation of ATPase activity	GO:0065007 biological regulation	3.16228e-06	19	AT3G16120|AT4G15930|AT4G27360|AT5G20110|AT1G23220
GO Biological Processes	GO:0050801	ion homeostasis	GO:0065007 biological regulation	0.000794328	2.3	CHX15|GLR2|GLR2.3|GLR2.2|AT3G13440|CHX19|bHLH38|bHLH39|ECA2|GLUR2|GLR2.1|KCO1|CCS|AT1G14040|ATCHX1|bHLH115|PSY1R|CHX2
GO Biological Processes	GO:0051345	positive regulation of hydrolase activity	GO:0065007 biological regulation	0.00398107	4	AT3G16120|AT4G15930|AT4G27360|AT5G20110|AT5G58510|AT1G23220
GO Biological Processes	GO:0055065	metal ion homeostasis	GO:0065007 biological regulation	0.001	2.7	GLR2|GLR2.3|GLR2.2|AT3G13440|bHLH38|bHLH39|ECA2|GLUR2|GLR2.1|KCO1|CCS|AT1G14040|bHLH115
GO Biological Processes	GO:0055067	monovalent inorganic cation homeostasis	GO:0065007 biological regulation	0.00398107	3.5	CHX15|CHX19|GLUR2|KCO1|ATCHX1|PSY1R|CHX2
GO Biological Processes	GO:0055074	calcium ion homeostasis	GO:0065007 biological regulation	0.00316228	4.1	GLR2|GLR2.3|GLR2.2|ECA2|GLUR2|GLR2.1
GO Biological Processes	GO:0055080	cation homeostasis	GO:0065007 biological regulation	3.98107e-05	3	CHX15|GLR2|GLR2.3|GLR2.2|AT3G13440|CHX19|bHLH38|bHLH39|ECA2|GLUR2|GLR2.1|KCO1|CCS|AT1G14040|ATCHX1|bHLH115|PSY1R|CHX2
GO Biological Processes	GO:0072503	cellular divalent inorganic cation homeostasis	GO:0065007 biological regulation	0.00398107	3.9	GLR2|GLR2.3|GLR2.2|ECA2|GLUR2|GLR2.1
GO Biological Processes	GO:0072507	divalent inorganic cation homeostasis	GO:0065007 biological regulation	0.00251189	3.8	GLR2|GLR2.3|GLR2.2|ECA2|GLUR2|GLR2.1|AT1G14040
GO Biological Processes	GO:0097054	L-glutamate biosynthetic process	GO:0065007 biological regulation	1.99526e-05	38	GLU2|GLU1|GLT1
GO Biological Processes	GO:0098771	inorganic ion homeostasis	GO:0065007 biological regulation	0.000125893	2.7	CHX15|GLR2|GLR2.3|GLR2.2|AT3G13440|CHX19|bHLH38|bHLH39|ECA2|GLUR2|GLR2.1|KCO1|CCS|AT1G14040|ATCHX1|bHLH115|PSY1R|CHX2
GO Biological Processes	GO:2000574	regulation of microtubule motor activity	GO:0065007 biological regulation	1.25893e-08	38	AT3G16120|AT4G15930|AT4G27360|AT5G20110|AT1G23220
GO Biological Processes	GO:2000576	positive regulation of microtubule motor activity	GO:0065007 biological regulation	1.25893e-08	38	AT3G16120|AT4G15930|AT4G27360|AT5G20110|AT1G23220
GO Biological Processes	GO:2000580	regulation of ATP-dependent microtubule motor activity, plus-end-directed	GO:0065007 biological regulation	1.25893e-08	38	AT3G16120|AT4G15930|AT4G27360|AT5G20110|AT1G23220
GO Biological Processes	GO:2000582	positive regulation of ATP-dependent microtubule motor activity, plus-end-directed	GO:0065007 biological regulation	1.25893e-08	38	AT3G16120|AT4G15930|AT4G27360|AT5G20110|AT1G23220
GO Biological Processes	GO:0009875	pollen-pistil interaction	GO:0051704 multi-organism process	0.00158489	4.1	RK3|AT4G27290|AT4G27300|AT5G24080|AT1G11300|AT1G34300|RK1
GO Biological Processes	GO:0048544	recognition of pollen	GO:0051704 multi-organism process	0.000316228	5.3	RK3|AT4G27290|AT4G27300|AT5G24080|AT1G11300|AT1G34300|RK1
GO Biological Processes	GO:0003333	amino acid transmembrane transport	GO:0051179 localization	5.01187e-05	7.1	GDU4|MBAC1|GDU2|GDU1|GDU5|BOU|GDU3
GO Biological Processes	GO:0006811	ion transport	GO:0051179 localization	0.000398107	1.9	AT2G03240|CHX15|GLR2|GLR2.3|GLR2.2|GDU4|BASS2|MBAC1|CHX19|AT3G29060|ATPD|KCO6|ECA2|KCO5|GDU2|GDU1|GLUR2|ATP5|GDU5|GLR2.1|KCO2|BOU|KCO1|GDU3|PHOT2|CCS|TPK4|AT1G14040|ATCHX1|AT1G26730|AT1G35350|IRT3|AT1G78560|CHX2
GO Biological Processes	GO:0006812	cation transport	GO:0051179 localization	0.00158489	2	CHX15|GLR2|GLR2.3|GLR2.2|MBAC1|CHX19|ATPD|KCO6|ECA2|KCO5|GDU1|GLUR2|ATP5|GLR2.1|KCO2|BOU|KCO1|CCS|TPK4|ATCHX1|IRT3|CHX2
GO Biological Processes	GO:0006816	calcium ion transport	GO:0051179 localization	0.00794328	3.4	GLR2|GLR2.3|GLR2.2|ECA2|GLUR2|GLR2.1
GO Biological Processes	GO:0006817	phosphate ion transport	GO:0051179 localization	0.00251189	5.2	AT2G03240|AT3G29060|AT1G14040|AT1G26730|AT1G35350
GO Biological Processes	GO:0006865	amino acid transport	GO:0051179 localization	0.000501187	4.9	GDU4|MBAC1|GDU2|GDU1|GDU5|BOU|GDU3
GO Biological Processes	GO:0006904	vesicle docking involved in exocytosis	GO:0051179 localization	0.0001	9.9	ATSLY1|SEC1B|AT4G31740|AT4G36100|KEU
GO Biological Processes	GO:0015837	amine transport	GO:0051179 localization	6.30957e-07	24	GDU4|GDU2|GDU1|GDU5|GDU3
GO Biological Processes	GO:0015849	organic acid transport	GO:0051179 localization	0.00501187	2.8	GDU4|BASS2|MBAC1|GDU2|GDU1|GDU5|BOU|GDU3|AT1G78560
GO Biological Processes	GO:0032890	regulation of organic acid transport	GO:0051179 localization	2.51189e-07	27	GDU4|GDU2|GDU1|GDU5|GDU3
GO Biological Processes	GO:0032940	secretion by cell	GO:0051179 localization	0.00125893	3.8	ATSLY1|SEC1B|GDU1|AT4G31740|AT4G36100|KEG|GDU3|KEU
GO Biological Processes	GO:0032973	amino acid export across plasma membrane	GO:0051179 localization	6.30957e-07	24	GDU4|GDU2|GDU1|GDU5|GDU3
GO Biological Processes	GO:0034220	ion transmembrane transport	GO:0051179 localization	0.000125893	2.4	CHX15|GDU4|BASS2|MBAC1|CHX19|ATPD|KCO6|ECA2|KCO5|GDU2|GDU1|ATP5|GDU5|KCO2|BOU|KCO1|GDU3|PHOT2|TPK4|ATCHX1|IRT3|AT1G78560|CHX2
GO Biological Processes	GO:0034762	regulation of transmembrane transport	GO:0051179 localization	1.58489e-05	8.3	GDU4|GDU2|GDU1|AT4G32250|GDU5|GDU3|PHOT2
GO Biological Processes	GO:0034765	regulation of ion transmembrane transport	GO:0051179 localization	0.0001	7.8	GDU4|GDU2|GDU1|GDU5|GDU3|PHOT2
GO Biological Processes	GO:0043269	regulation of ion transport	GO:0051179 localization	0.00251189	4.3	GDU4|GDU2|GDU1|GDU5|GDU3|PHOT2
GO Biological Processes	GO:0044070	regulation of anion transport	GO:0051179 localization	1.25893e-05	11	GDU4|GDU2|GDU1|GDU5|GDU3|PHOT2
GO Biological Processes	GO:0046903	secretion	GO:0051179 localization	0.00251189	3.4	ATSLY1|SEC1B|GDU1|AT4G31740|AT4G36100|KEG|GDU3|KEU
GO Biological Processes	GO:0046942	carboxylic acid transport	GO:0051179 localization	0.00398107	2.9	GDU4|BASS2|MBAC1|GDU2|GDU1|GDU5|BOU|GDU3|AT1G78560
GO Biological Processes	GO:0048278	vesicle docking	GO:0051179 localization	0.00501187	4.5	ATSLY1|SEC1B|AT4G31740|AT4G36100|KEU
GO Biological Processes	GO:0051952	regulation of amine transport	GO:0051179 localization	2.51189e-07	27	GDU4|GDU2|GDU1|GDU5|GDU3
GO Biological Processes	GO:0051955	regulation of amino acid transport	GO:0051179 localization	2.51189e-07	27	GDU4|GDU2|GDU1|GDU5|GDU3
GO Biological Processes	GO:0071804	cellular potassium ion transport	GO:0051179 localization	0.00630957	4.3	KCO6|KCO5|KCO2|KCO1|TPK4
GO Biological Processes	GO:0071805	potassium ion transmembrane transport	GO:0051179 localization	0.00630957	4.3	KCO6|KCO5|KCO2|KCO1|TPK4
GO Biological Processes	GO:0080143	regulation of amino acid export	GO:0051179 localization	2.51189e-07	27	GDU4|GDU2|GDU1|GDU5|GDU3
GO Biological Processes	GO:0098655	cation transmembrane transport	GO:0051179 localization	0.00199526	2.3	CHX15|MBAC1|CHX19|ATPD|KCO6|ECA2|KCO5|ATP5|KCO2|BOU|KCO1|TPK4|ATCHX1|IRT3|CHX2
GO Biological Processes	GO:0098656	anion transmembrane transport	GO:0051179 localization	0.00251189	2.9	GDU4|BASS2|MBAC1|GDU2|GDU1|GDU5|BOU|GDU3|PHOT2|AT1G78560
GO Biological Processes	GO:0098662	inorganic cation transmembrane transport	GO:0051179 localization	0.00794328	2.2	CHX15|CHX19|ATPD|KCO6|ECA2|KCO5|ATP5|KCO2|KCO1|TPK4|ATCHX1|IRT3|CHX2
GO Biological Processes	GO:0140029	exocytic process	GO:0051179 localization	0.0001	9.9	ATSLY1|SEC1B|AT4G31740|AT4G36100|KEU
GO Biological Processes	GO:0140115	export across plasma membrane	GO:0051179 localization	1.99526e-06	11	GDU4|KCO6|GDU2|GDU1|GDU5|KCO1|GDU3
GO Biological Processes	GO:1903789	regulation of amino acid transmembrane transport	GO:0051179 localization	2.51189e-07	27	GDU4|GDU2|GDU1|GDU5|GDU3
GO Biological Processes	GO:1903825	organic acid transmembrane transport	GO:0051179 localization	5.01187e-05	5.2	GDU4|BASS2|MBAC1|GDU2|GDU1|GDU5|BOU|GDU3|AT1G78560
GO Biological Processes	GO:1903959	regulation of anion transmembrane transport	GO:0051179 localization	5.01187e-06	13	GDU4|GDU2|GDU1|GDU5|GDU3|PHOT2
GO Biological Processes	GO:1905039	carboxylic acid transmembrane transport	GO:0051179 localization	3.98107e-05	5.4	GDU4|BASS2|MBAC1|GDU2|GDU1|GDU5|BOU|GDU3|AT1G78560
GO Biological Processes	GO:0006986	response to unfolded protein	GO:0050896 response to stimulus	0.00630957	4.2	mtHsc70-1|MTHSC70-2|BIP1|BIP2|BIP3
GO Biological Processes	GO:0009266	response to temperature stimulus	GO:0050896 response to stimulus	0.00158489	1.8	SVP|CLPB4|AT2G25790|TDX|AT3G22690|ICE1|AT3G55580|AT4G04650|ATPD|Hop3|AT4G17250|AGL19|cpHsc70-1|AGL24|mtHsc70-1|MTHSC70-2|HD2C|BIP1|BIP2|HOT5|cpHsc70-2|PGM|CRLK1|NPX1|BIP3|SCRM2|CCR1|AT1G24620|AT1G45231|SERAT2;1|ADH1
GO Biological Processes	GO:0009416	response to light stimulus	GO:0050896 response to stimulus	0.00251189	1.7	PKS1|GLR2|PIL5|GLR2.3|GLR2.2|COP1|BLH1|DET2|COI1|AT3G22690|TT5|GATA4|FAR1|KCO6|AT4G32250|GATA9|GLUR2|AT4G36100|GLU1|PKS4|KNAT4|CSA1|RUP2|KNAT3|GLR2.1|NF-YB2|PAT1|RUP1|ZTL|PHOT2|AT5G61510|UVR8|PKS2|AT1G18810|SPPA
GO Biological Processes	GO:0009638	phototropism	GO:0050896 response to stimulus	0.000501187	7.3	PKS1|PKS4|PHOT2|PKS2|AT1G18810
GO Biological Processes	GO:0009639	response to red or far red light	GO:0050896 response to stimulus	0.00794328	2.2	PKS1|PIL5|COP1|BLH1|COI1|FAR1|AT4G32250|AT4G36100|PKS4|CSA1|PAT1|RUP1|ZTL
GO Biological Processes	GO:0010038	response to metal ion	GO:0050896 response to stimulus	0.00199526	2	AT2G32240|AT3G10890|AT3G11830|SERAT2;2|DDI1|AT3G18190|RAD54|HIP1|cpHsc70-1|mtHsc70-1|MTHSC70-2|NADP-ME2|AT5G38830|AT5G38990|BIP2|cpHsc70-2|GLT1|AT5G60160|PGM3|PAB8|AT1G57720|PGM2|ADH1
GO Biological Processes	GO:0010218	response to far red light	GO:0050896 response to stimulus	0.00630957	4.2	PKS1|BLH1|COI1|FAR1|RUP1
GO Biological Processes	GO:0034620	cellular response to unfolded protein	GO:0050896 response to stimulus	0.00630957	4.2	mtHsc70-1|MTHSC70-2|BIP1|BIP2|BIP3
GO Biological Processes	GO:0043200	response to amino acid	GO:0050896 response to stimulus	0.000251189	6.7	GLR2|GLR2.3|GLR2.2|GLUR2|GLR2.1|FBS1
GO Biological Processes	GO:0046686	response to cadmium ion	GO:0050896 response to stimulus	0.000125893	2.5	AT2G32240|AT3G10890|AT3G11830|SERAT2;2|DDI1|AT3G18190|HIP1|cpHsc70-1|mtHsc70-1|MTHSC70-2|NADP-ME2|AT5G38830|BIP2|cpHsc70-2|GLT1|AT5G60160|PGM3|PAB8|AT1G57720|PGM2|ADH1
GO Biological Processes	GO:0051606	detection of stimulus	GO:0050896 response to stimulus	0.00398107	3.9	PKS1|KIN10|KNAT5|KNAT3|PAT1|PGM
GO Biological Processes	GO:0071230	cellular response to amino acid stimulus	GO:0050896 response to stimulus	0.000251189	8.6	GLR2|GLR2.3|GLR2.2|GLUR2|GLR2.1
GO Biological Processes	GO:0071417	cellular response to organonitrogen compound	GO:0050896 response to stimulus	0.000316228	6.3	GLR2|AT2G23950|GLR2.3|GLR2.2|GLUR2|GLR2.1
GO Biological Processes	GO:1901699	cellular response to nitrogen compound	GO:0050896 response to stimulus	0.000630957	4.7	GLR2|ACO1|AT2G23950|GLR2.3|GLR2.2|GLUR2|GLR2.1
GO Biological Processes	GO:0010115	regulation of abscisic acid biosynthetic process	GO:0050789 regulation of biological process	0.00794328	7.1	ICE1|AT5G04760|AT5G08520
GO Biological Processes	GO:0007094	mitotic spindle assembly checkpoint	GO:0048519 negative regulation of biological process	0.00251189	10	AT2G20635|BUBR1|AT5G05510
GO Biological Processes	GO:0031577	spindle checkpoint	GO:0048519 negative regulation of biological process	0.00251189	10	AT2G20635|BUBR1|AT5G05510
GO Biological Processes	GO:0033046	negative regulation of sister chromatid segregation	GO:0048519 negative regulation of biological process	0.00251189	10	AT2G20635|BUBR1|AT5G05510
GO Biological Processes	GO:0033048	negative regulation of mitotic sister chromatid segregation	GO:0048519 negative regulation of biological process	0.00251189	10	AT2G20635|BUBR1|AT5G05510
GO Biological Processes	GO:0045841	negative regulation of mitotic metaphase/anaphase transition	GO:0048519 negative regulation of biological process	0.00251189	10	AT2G20635|BUBR1|AT5G05510
GO Biological Processes	GO:0051985	negative regulation of chromosome segregation	GO:0048519 negative regulation of biological process	0.00251189	10	AT2G20635|BUBR1|AT5G05510
GO Biological Processes	GO:0071173	spindle assembly checkpoint	GO:0048519 negative regulation of biological process	0.00251189	10	AT2G20635|BUBR1|AT5G05510
GO Biological Processes	GO:0071174	mitotic spindle checkpoint	GO:0048519 negative regulation of biological process	0.00251189	10	AT2G20635|BUBR1|AT5G05510
GO Biological Processes	GO:1902100	negative regulation of metaphase/anaphase transition of cell cycle	GO:0048519 negative regulation of biological process	0.00251189	10	AT2G20635|BUBR1|AT5G05510
GO Biological Processes	GO:1905819	negative regulation of chromosome separation	GO:0048519 negative regulation of biological process	0.00251189	10	AT2G20635|BUBR1|AT5G05510
GO Biological Processes	GO:2000816	negative regulation of mitotic sister chromatid separation	GO:0048519 negative regulation of biological process	0.00251189	10	AT2G20635|BUBR1|AT5G05510
GO Biological Processes	GO:0080113	regulation of seed growth	GO:0040007 growth	0.00630957	7.5	RR12|RR1|RR2
GO Biological Processes	GO:0022611	dormancy process	GO:0032502 developmental process	0.01	3.8	ICE1|HDA3|HD2C|HD2B|ET2
GO Biological Processes	GO:0010162	seed dormancy process	GO:0022414 reproductive process	0.01	3.8	ICE1|HDA3|HD2C|HD2B|ET2
GO Biological Processes	GO:0045144	meiotic sister chromatid segregation	GO:0022414 reproductive process	0.01	6.7	AT2G20635|BUBR1|AT5G05510
GO Biological Processes	GO:0048449	floral organ formation	GO:0022414 reproductive process	0.00501187	5.8	HEN1|AP2|EMS1|PAPS1
GO Biological Processes	GO:0051177	meiotic sister chromatid cohesion	GO:0022414 reproductive process	0.01	6.7	AT2G20635|BUBR1|AT5G05510
GO Biological Processes	GO:0051754	meiotic sister chromatid cohesion, centromeric	GO:0022414 reproductive process	0.000316228	19	AT2G20635|BUBR1|AT5G05510
GO Biological Processes	GO:0019676	ammonia assimilation cycle	GO:0019740 nitrogen utilization	0.000316228	19	GLU2|GLU1|GLT1
GO Biological Processes	GO:0019740	nitrogen utilization	GO:0019740 nitrogen utilization	0.00251189	10	GLU2|GLU1|GLT1
GO Biological Processes	GO:0006457	protein folding	GO:0009987 cellular process	2.51189e-05	3.4	CLPB4|AT3G11830|TDX|AT3G18190|TCP-1|HIP1|cpHsc70-1|mtHsc70-1|MTHSC70-2|AT5G20890|AT5G26360|BIP1|BIP2|cpHsc70-2|AT5G60160|BIP3
GO Biological Processes	GO:0006458	'de novo' protein folding	GO:0009987 cellular process	0.000251189	5.5	TDX|HIP1|mtHsc70-1|MTHSC70-2|BIP1|BIP2|BIP3
GO Biological Processes	GO:0008037	cell recognition	GO:0009987 cellular process	0.000398107	5.1	RK3|AT4G27290|AT4G27300|AT5G24080|AT1G11300|AT1G34300|RK1
GO Biological Processes	GO:0042026	protein refolding	GO:0009987 cellular process	0.000125893	7.3	CLPB4|mtHsc70-1|MTHSC70-2|BIP1|BIP2|BIP3
GO Biological Processes	GO:0051084	'de novo' posttranslational protein folding	GO:0009987 cellular process	0.000199526	5.7	TDX|HIP1|mtHsc70-1|MTHSC70-2|BIP1|BIP2|BIP3
GO Biological Processes	GO:0051085	chaperone cofactor-dependent protein refolding	GO:0009987 cellular process	0.000199526	5.7	TDX|HIP1|mtHsc70-1|MTHSC70-2|BIP1|BIP2|BIP3
GO Biological Processes	GO:0061077	chaperone-mediated protein folding	GO:0009987 cellular process	0.000251189	4.8	TDX|HIP1|mtHsc70-1|MTHSC70-2|BIP1|BIP2|AT5G60160|BIP3
GO Biological Processes	GO:0000096	sulfur amino acid metabolic process	GO:0008152 metabolic process	0.000251189	4.7	ATSERAT3;1|SERAT2;2|AT3G26115|BAT5|EDA9|SERAT3;2|SERAT1;1|SERAT2;1
GO Biological Processes	GO:0000097	sulfur amino acid biosynthetic process	GO:0008152 metabolic process	0.00316228	5	ATSERAT3;1|SERAT2;2|SERAT3;2|SERAT1;1|SERAT2;1
GO Biological Processes	GO:0000162	tryptophan biosynthetic process	GO:0008152 metabolic process	0.00316228	6.6	TRP1|AT5G57890|AT1G25155|ASB1
GO Biological Processes	GO:0006026	aminoglycan catabolic process	GO:0008152 metabolic process	0.00630957	7.5	AT4G19720|AT4G19800|ChiC
GO Biological Processes	GO:0006030	chitin metabolic process	GO:0008152 metabolic process	0.00630957	7.5	AT4G19720|AT4G19800|ChiC
GO Biological Processes	GO:0006032	chitin catabolic process	GO:0008152 metabolic process	0.00630957	7.5	AT4G19720|AT4G19800|ChiC
GO Biological Processes	GO:0006423	cysteinyl-tRNA aminoacylation	GO:0008152 metabolic process	1.99526e-05	38	SYCO ARATH|AT3G56300|AT5G38830
GO Biological Processes	GO:0006520	cellular amino acid metabolic process	GO:0008152 metabolic process	7.94328e-05	2.3	AGT|ATSERAT3;1|SYCO ARATH|GLU2|SERAT2;2|AT3G26115|NodGS|AT3G56300|BAT5|EDA9|SERAT3;2|GLU1|GLN1;4|TRP1|MAM1|AT5G26710|AT5G38830|DELTA-OAT|GLT1|SERAT1;1|AT5G57890|AT1G25155|ASB1|SERAT2;1|GSR2|AT1G72550
GO Biological Processes	GO:0006534	cysteine metabolic process	GO:0008152 metabolic process	0.0001	7.8	ATSERAT3;1|SERAT2;2|AT3G26115|SERAT3;2|SERAT1;1|SERAT2;1
GO Biological Processes	GO:0006535	cysteine biosynthetic process from serine	GO:0008152 metabolic process	1.99526e-05	13	ATSERAT3;1|SERAT2;2|SERAT3;2|SERAT1;1|SERAT2;1
GO Biological Processes	GO:0006536	glutamate metabolic process	GO:0008152 metabolic process	0.00501187	5.6	GLU2|GLU1|DELTA-OAT|GLT1
GO Biological Processes	GO:0006537	glutamate biosynthetic process	GO:0008152 metabolic process	7.94328e-05	28	GLU2|GLU1|GLT1
GO Biological Processes	GO:0006541	glutamine metabolic process	GO:0008152 metabolic process	1.25893e-06	15	GLU2|NodGS|GLU1|GLN1;4|GLT1|GSR2
GO Biological Processes	GO:0006542	glutamine biosynthetic process	GO:0008152 metabolic process	0.000630957	16	NodGS|GLN1;4|GSR2
GO Biological Processes	GO:0006563	L-serine metabolic process	GO:0008152 metabolic process	0.0001	7.8	ATSERAT3;1|SERAT2;2|EDA9|SERAT3;2|SERAT1;1|SERAT2;1
GO Biological Processes	GO:0008652	cellular amino acid biosynthetic process	GO:0008152 metabolic process	1.99526e-06	3.5	AGT|ATSERAT3;1|GLU2|SERAT2;2|NodGS|EDA9|SERAT3;2|GLU1|GLN1;4|TRP1|MAM1|DELTA-OAT|GLT1|SERAT1;1|AT5G57890|AT1G25155|ASB1|SERAT2;1|GSR2
GO Biological Processes	GO:0009064	glutamine family amino acid metabolic process	GO:0008152 metabolic process	0.00158489	4.1	GLU2|NodGS|GLU1|GLN1;4|DELTA-OAT|GLT1|GSR2
GO Biological Processes	GO:0009069	serine family amino acid metabolic process	GO:0008152 metabolic process	0.000199526	4.9	AGT|ATSERAT3;1|SERAT2;2|AT3G26115|EDA9|SERAT3;2|SERAT1;1|SERAT2;1
GO Biological Processes	GO:0009070	serine family amino acid biosynthetic process	GO:0008152 metabolic process	0.000125893	6.1	AGT|ATSERAT3;1|SERAT2;2|EDA9|SERAT3;2|SERAT1;1|SERAT2;1
GO Biological Processes	GO:0009084	glutamine family amino acid biosynthetic process	GO:0008152 metabolic process	1.58489e-05	8.3	GLU2|NodGS|GLU1|GLN1;4|DELTA-OAT|GLT1|GSR2
GO Biological Processes	GO:0019344	cysteine biosynthetic process	GO:0008152 metabolic process	7.94328e-05	10	ATSERAT3;1|SERAT2;2|SERAT3;2|SERAT1;1|SERAT2;1
GO Biological Processes	GO:0034308	primary alcohol metabolic process	GO:0008152 metabolic process	0.00501187	8.1	PES2|HOT5|PES1
GO Biological Processes	GO:0042126	nitrate metabolic process	GO:0008152 metabolic process	0.00501187	8.1	GLN1;4|GLT1|GSR2
GO Biological Processes	GO:0042128	nitrate assimilation	GO:0008152 metabolic process	0.00501187	8.1	GLN1;4|GLT1|GSR2
GO Biological Processes	GO:0043648	dicarboxylic acid metabolic process	GO:0008152 metabolic process	0.01	3	GLU2|GLU1|NADP-ME2|NADP-ME3|DELTA-OAT|GLT1|NADP-ME4
GO Biological Processes	GO:0046219	indolalkylamine biosynthetic process	GO:0008152 metabolic process	0.00316228	6.6	TRP1|AT5G57890|AT1G25155|ASB1
GO Biological Processes	GO:0046292	formaldehyde metabolic process	GO:0008152 metabolic process	0.00125893	13	HOT5|AT1G32780|ADH1
GO Biological Processes	GO:0046348	amino sugar catabolic process	GO:0008152 metabolic process	0.00630957	7.5	AT4G19720|AT4G19800|ChiC
GO Biological Processes	GO:0046777	protein autophosphorylation	GO:0008152 metabolic process	0.00316228	2.5	ATSK12|KIN11|FER|AT3G61160|SK32|SD2-5|EMS1|SK13|ANX2|AT5G38990|PHOT2|RK1
GO Biological Processes	GO:1901072	glucosamine-containing compound catabolic process	GO:0008152 metabolic process	0.00630957	7.5	AT4G19720|AT4G19800|ChiC
GO Biological Processes	GO:1901605	alpha-amino acid metabolic process	GO:0008152 metabolic process	6.30957e-05	2.6	AGT|ATSERAT3;1|GLU2|SERAT2;2|AT3G26115|NodGS|BAT5|EDA9|SERAT3;2|GLU1|GLN1;4|TRP1|MAM1|DELTA-OAT|GLT1|SERAT1;1|AT5G57890|AT1G25155|ASB1|SERAT2;1|GSR2
GO Biological Processes	GO:1901607	alpha-amino acid biosynthetic process	GO:0008152 metabolic process	3.98107e-07	3.9	AGT|ATSERAT3;1|GLU2|SERAT2;2|NodGS|EDA9|SERAT3;2|GLU1|GLN1;4|TRP1|MAM1|DELTA-OAT|GLT1|SERAT1;1|AT5G57890|AT1G25155|ASB1|SERAT2;1|GSR2
GO Biological Processes	GO:2001057	reactive nitrogen species metabolic process	GO:0008152 metabolic process	0.00125893	7.9	GLN1;4|GLT1|GSR2|CML23
KEGG Pathway	ath_M00021	Cysteine biosynthesis, serine => cysteine	-	3.16228e-05	13	ATSERAT3;1|SERAT2;2|SERAT3;2|SERAT1;1|SERAT2;1
KEGG Pathway	ath_M00023	Tryptophan biosynthesis, chorismate => tryptophan	-	1.25893e-05	11	TRP1|AT5G57890|AT1G24909|AT1G25083|AT1G25155|ASB1
KEGG Pathway	ath_M00169	CAM (Crassulacean acid metabolism), light	-	0.000199526	23	NADP-ME2|NADP-ME3|NADP-ME4
KEGG Pathway	ath_M00172	C4-dicarboxylic acid cycle, NADP - malic enzyme type	-	0.00199526	11	NADP-ME2|NADP-ME3|NADP-ME4
KEGG Pathway	ath_M00549	Nucleotide sugar biosynthesis, glucose => UDP-glucose	-	0.00251189	10	PGM|PGM3|PGM2
KEGG Pathway	ath00010	Glycolysis / Gluconeogenesis	-	0.00398107	2.9	ALDH3I1|HOT5|PGM|PGM3|AT1G32780|ALDH3H1|AT1G64710|PGM2|ADH1
KEGG Pathway	ath00071	Fatty acid degradation	-	0.000630957	5.5	ALDH3I1|HOT5|AT1G32780|ALDH3H1|AT1G64710|ADH1
KEGG Pathway	ath00400	Phenylalanine, tyrosine and tryptophan biosynthesis	-	0.00398107	4	TRP1|AT5G57890|AT1G24909|AT1G25083|AT1G25155|ASB1
KEGG Pathway	ath00920	Sulfur metabolism	-	0.00398107	4.6	ATSERAT3;1|SERAT2;2|SERAT3;2|SERAT1;1|SERAT2;1
KEGG Pathway	ath01230	Biosynthesis of amino acids	-	0.00794328	2.1	ATSERAT3;1|SERAT2;2|EDA9|SERAT3;2|GLN1;4|TRP1|GLT1|SERAT1;1|AT5G57890|AT1G24909|AT1G25083|AT1G25155|ASB1|SERAT2;1
KEGG Pathway	ath03040	Spliceosome	-	0.00199526	2.6	MAC5B|PRP40C|U1-70K|AT4G12600|AT4G22380|cpHsc70-1|AT5G04210|MAC5C|MTHSC70-2|AT5G10800|AT5G20160|cpHsc70-2|MAC5A
KEGG Pathway	ko00010	Glycolysis / Gluconeogenesis	-	0.00398107	2.9	ALDH3I1|HOT5|PGM|PGM3|AT1G32780|ALDH3H1|AT1G64710|PGM2|ADH1
KEGG Pathway	ko00071	Fatty acid degradation	-	0.000630957	5.5	ALDH3I1|HOT5|AT1G32780|ALDH3H1|AT1G64710|ADH1
KEGG Pathway	ko00400	Phenylalanine, tyrosine and tryptophan biosynthesis	-	0.00398107	4	TRP1|AT5G57890|AT1G24909|AT1G25083|AT1G25155|ASB1
KEGG Pathway	ko00920	Sulfur metabolism	-	0.00398107	4.6	ATSERAT3;1|SERAT2;2|SERAT3;2|SERAT1;1|SERAT2;1
KEGG Pathway	ko01230	Biosynthesis of amino acids	-	0.00794328	2.1	ATSERAT3;1|SERAT2;2|EDA9|SERAT3;2|GLN1;4|TRP1|GLT1|SERAT1;1|AT5G57890|AT1G24909|AT1G25083|AT1G25155|ASB1|SERAT2;1
KEGG Pathway	ko03040	Spliceosome	-	0.00199526	2.6	MAC5B|PRP40C|U1-70K|AT4G12600|AT4G22380|cpHsc70-1|AT5G04210|MAC5C|MTHSC70-2|AT5G10800|AT5G20160|cpHsc70-2|MAC5A
KEGG Pathway	M00021	Cysteine biosynthesis, serine => cysteine	-	3.16228e-05	13	ATSERAT3;1|SERAT2;2|SERAT3;2|SERAT1;1|SERAT2;1
KEGG Pathway	M00023	Tryptophan biosynthesis, chorismate => tryptophan	-	1.25893e-05	11	TRP1|AT5G57890|AT1G24909|AT1G25083|AT1G25155|ASB1
KEGG Pathway	M00169	CAM (Crassulacean acid metabolism), light	-	0.000199526	23	NADP-ME2|NADP-ME3|NADP-ME4
KEGG Pathway	M00172	C4-dicarboxylic acid cycle, NADP - malic enzyme type	-	0.00199526	11	NADP-ME2|NADP-ME3|NADP-ME4
KEGG Pathway	M00549	Nucleotide sugar biosynthesis, glucose => UDP-glucose	-	0.00251189	10	PGM|PGM3|PGM2
WikiPathways	WP2108	Flower Development (Initiation)	-	0.01	6.7	SVP|AGL24|AP2
WikiPathways	WP2279	Seed Development	-	0.00251189	2.1	SVP|bHLH38|bHLH39|AT4G19720|AT4G19800|ChiC|AT4G19820|SK32|AGL19|SSP5|SMT1|TRP1|HOT5|GLT1|AT1G09640|AT1G12760|AT1G57720|GSR2|CML23
